# Supplementary material for: Efficiency comparison of DNA extraction kits for analysing the cockle gut bacteriome
Source: PubMed Central journal article supplement (PMC11620152; doi:10.1016/j.heliyon.2024.e38846), 2024-10-09
Supplement: mmc1.pdf [file mmc1.pdf]

## **Supplementary material**

# **Efficiency Comparison of DNA Extraction Kits for Analysing the Cockle Gut Bacteriome**

Catarina F. Lourenço, Ana R. Almeida, Amadeu M.V.M. Soares, Catarina R. Marques\*

Center for Environmental and Marine Studies (CESAM) & Department of Biology, University of Aveiro, Campus Universitário de Santiago,  
3810-193, Aveiro, Portugal

\* E-mail address: [crmarques@ua.pt](mailto:crmarques@ua.pt)

## 1. Supplementary Tables and Figures

### 1.1. Supplementary Tables

**Table S1** - Major extraction steps instructed by the manufacturer for each of the five DNA extraction kits.

| Extraction steps          | E.Z.N.A.                                                                                        | FastDNA                                           | DNeasy                                                  | PowerFecal                                                                   | Zymo                                                                                   |
|---------------------------|-------------------------------------------------------------------------------------------------|---------------------------------------------------|---------------------------------------------------------|------------------------------------------------------------------------------|----------------------------------------------------------------------------------------|
| <b>Sample preparation</b> | Sample added to glass beads; SLX-Mlus buffer added.                                             | Sample added to Lysing Matrix A Tube.             | Sample added to PowerBead Pro Tube; Solution CD1 added. | Sample added to PowerBead and C1 solutions.                                  | Sample added to ZR BashingBead Lysis Tubes.                                            |
| <b>Cell lysis</b>         | Vortex-homogenised. DS buffer added; incubate 2 times (70 °C and 95 °C).                        | CLS-TC added; homogenised in FastPrep Instrument. | Homogenised in vortex.                                  | Heated at 65 °C. Vortex-homogenised. Solution C2 added; incubated at 2-8 °C. | ZymoBIOMICS lysis solution added. Vortex-homogenised.                                  |
| <b>Inhibitor removal</b>  | P2 buffer added; incubated at -20 °C; isopropanol added; incubated at 70 °C; HTR Reagent added. | -                                                 | Solution CD2 added.                                     | Solution C3 added; incubated at 2-8°C.                                       | Supernatant transferred to Zymo-Spin III-F Filter.                                     |
| <b>DNA Binding</b>        | XP1 Buffer added; loaded onto HiBind DNA Mini Column.                                           | Added to Binding Matrix.                          | CD3 solution added; loaded onto MB Spin Column.         | Solution C4 added; loaded onto MB Spin Column.                               | ZymoBIOMICS DNA Binding Buffer added; mixture transferred to Zymo-Spin IICR Column.    |
| <b>Wash</b>               | Washed with XP1 Buffer and SPW Buffer.                                                          | Washed with SEWS-M.                               | Washed with Solution EA, and Solution C5.               | Washed with Solution C5.                                                     | Add ZymoBIOMICS DNA Wash Buffer 1; ZymoBIOMICS DNA Wash Buffer 2 added.                |
| <b>Elute DNA</b>          | Eluted with Elution Buffer heated at 70 °C; incubated at 70 °C for 5'.                          | Eluted with DES; incubated at 55 °C.              | Eluted with Solution C6.                                | Eluted with Solution C6.                                                     | Eluted with ZymoBIOMICS DNase/ RNase Free Water; Zymo BIOMICS HCR Prep Solution added. |

**Table S2** – Summary of the one-way analysis of variance (*F*) for different parameters associated with the DNA extraction undertaken with the five kits. [*DNA*]- concentration of DNA; *df* – degrees of freedom; *P value* – value of probability.

| Parameter                | Source of variation | <i>df</i> | <i>F</i> | <i>P value</i> |
|--------------------------|---------------------|-----------|----------|----------------|
| [DNA]                    | Between Groups      | 4,19      | 30.508   | <0.001         |
| Amount of DNA/<br>mg gut | Between Groups      | 4,19      | 24.996   | <0.001         |
| Extraction efficiency    | Between Groups      | 4,19      | 12.012   | <0.001         |

**Table S3** – Summary of the one-way ANOVA applied to the DGGE band patterns obtained from the PCR amplicons for the five extraction kits.

| <b>DNA extraction kits</b> | <b>Source of variance</b> | <b>Degree of Freedom (df)</b> | <b>Sum square (SS)</b> | <b>Mean Square (MS)</b> | <b>F ratio</b> | <b>P value</b> | <b>F critic</b> |
|----------------------------|---------------------------|-------------------------------|------------------------|-------------------------|----------------|----------------|-----------------|
| E.Z.N.A.                   | Between replicates        | 0.000003                      | 3                      | 0.000001                | 0.000522       | 0.999983       | 2.669256        |
|                            | Within replicates         | 0.226196                      | 140                    | 0.001616                |                |                |                 |
|                            | Total                     | 0.226198                      | 143                    |                         |                |                |                 |
| FastDNA                    | Between replicates        | 0.001373                      | 4                      | 0.000343                | 0.039056       | 0.997074       | 2.423286        |
|                            | Within replicates         | 1.538241                      | 175                    | 0.008790                |                |                |                 |
|                            | Total                     | 1.539614                      | 179                    |                         |                |                |                 |
| PowerFecal                 | Between replicates        | 0.000014                      | 4.0                    | 0.000003                | 0.001499       | 0.999995       | 2.423286        |
|                            | Within replicates         | 0.400576                      | 175.0                  | 0.002289                |                |                |                 |
|                            | Total                     | 0.400590                      | 179.0                  |                         |                |                |                 |
| Dneasy                     | Between replicates        | 0.000042                      | 4                      | 0.000010                | 0.004865       | 0.999952       | 2.423286        |
|                            | Within replicates         | 0.374653                      | 175                    | 0.002141                |                |                |                 |
|                            | Total                     | 0.374695                      | 179                    |                         |                |                |                 |
| Zymo                       | Between replicates        | 0.000006                      | 4                      | 0.000001                | 0.000844       | 0.999999       | 2.423286        |
|                            | Within replicates         | 0.309652                      | 175                    | 0.001769                |                |                |                 |
|                            | Total                     | 0.309658                      | 179                    |                         |                |                |                 |

**Table S4** – Relative abundance of bacterial OTUs identified in the *Cerastoderma edule* gut by four DNA extraction kits (E.Z.N.A., DNeasy, PowerFecal, and Zymo). nd – not determined.

| #OTU ID | E.Z.N.A. | DNeasy  | PowerFecal | Zymo    | SUM     | Phylum         | Class                 | Order             | Family                 | Genus                 | Species                   | Gram Stain |
|---------|----------|---------|------------|---------|---------|----------------|-----------------------|-------------------|------------------------|-----------------------|---------------------------|------------|
| OTU_2   | 0.12893  | 0.10069 | 0.13987    | 0.16360 | 0.53309 | Tenericutes    | Mollicutes            | Mycoplasmatales   | Mycoplasmataceae       | <i>Mycoplasma</i>     | <i>M. marinum</i>         | -          |
| OTU_1   | 0.29687  | 0.06042 | 0.06400    | 0.03858 | 0.45987 | Tenericutes    | Mollicutes            | Mycoplasmatales   | Mycoplasmataceae       | <i>Mycoplasma</i>     | <i>M. marinum</i>         | -          |
| OTU_4   | 0.00316  | 0.19845 | 0.12507    | 0.07611 | 0.40278 | Tenericutes    | Mollicutes            | Mycoplasmatales   | Mycoplasmataceae       | <i>Mycoplasma</i>     | <i>M. marinum</i>         | -          |
| OTU_5   | 0.04512  | 0.05751 | 0.06976    | 0.13754 | 0.30992 | Tenericutes    | Mollicutes            | Mycoplasmatales   | Mycoplasmataceae       | <i>Mycoplasma</i>     | <i>M. marinum</i>         | -          |
| OTU_8   | 0.04500  | 0.02539 | 0.03203    | 0.04668 | 0.14910 | Tenericutes    | Mollicutes            | Mycoplasmatales   | Mycoplasmataceae       | <i>Mycoplasma</i>     | <i>M. marinum</i>         | -          |
| OTU_7   | 0.03904  | 0.03627 | 0.02036    | 0.05130 | 0.14697 | Tenericutes    | Mollicutes            | Mycoplasmatales   | Mycoplasmataceae       | <i>Mycoplasma</i>     | <i>M. marinum</i>         | -          |
| OTU_10  | 0.00721  | 0.03737 | 0.00631    | 0.09002 | 0.14090 | Proteobacteria | Alphaproteobacteria   | Rickettsiales     | Anaplasmataceae        | <i>Anaplasma</i>      | <i>A. phagocytophilum</i> | -          |
| OTU_3   | 0.01773  | 0.02615 | 0.02664    | 0.03997 | 0.11049 | Proteobacteria | Epsilonproteobacteria | Campylobacterales | Campylobacteraceae     | <i>Arcobacter</i>     | <i>A. nitrofigilis</i>    | -          |
| OTU_12  | 0.00755  | 0.01975 | 0.02772    | 0.03397 | 0.08899 | Tenericutes    | Mollicutes            | Mycoplasmatales   | Mycoplasmataceae       | <i>Mycoplasma</i>     | <i>M. marinum</i>         | -          |
| OTU_6   | 0.05537  | 0.00805 | 0.00173    | 0.00095 | 0.06610 | Proteobacteria | Gammaproteobacteria   | Thiotrichales     | Fastidiosibacteraceae  | <i>Cysteiniphilum</i> | nd                        | -          |
| OTU_14  | 0.01924  | 0.01527 | 0.00807    | 0.00952 | 0.05210 | Tenericutes    | Mollicutes            | Mycoplasmatales   | Mycoplasmataceae       | <i>Mycoplasma</i>     | <i>M. marinum</i>         | -          |
| OTU_15  | 0.00000  | 0.00422 | 0.03413    | 0.00750 | 0.04584 | Proteobacteria | Deltaproteobacteria   | Desulfobacterales | Desulfobulbaceae       | <i>Desulfobulbus</i>  | nd                        | -          |
| OTU_9   | 0.00000  | 0.01404 | 0.01530    | 0.01612 | 0.04545 | Proteobacteria | Gammaproteobacteria   | Oceanospirillales | Endozoicomonadaceae    | <i>Endozoicomonas</i> | nd                        | -          |
| OTU_20  | 0.00000  | 0.04392 | 0.00000    | 0.00000 | 0.04392 | Tenericutes    | Mollicutes            | Mycoplasmatales   | Mycoplasmataceae       | <i>Mycoplasma</i>     | <i>M. marinum</i>         | -          |
| OTU_19  | 0.00239  | 0.00870 | 0.00843    | 0.02345 | 0.04298 | Tenericutes    | Mollicutes            | Mycoplasmatales   | Mycoplasmataceae       | <i>Mycoplasma</i>     | <i>M. marinum</i>         | -          |
| OTU_24  | 0.00000  | 0.02106 | 0.00700    | 0.01021 | 0.03826 | Tenericutes    | Mollicutes            | Mycoplasmatales   | Mycoplasmataceae       | <i>Mycoplasma</i>     | <i>M. marinum</i>         | -          |
| OTU_11  | 0.00000  | 0.02971 | 0.00000    | 0.00591 | 0.03562 | Bacteroidetes  | Bacteroidia           | Marinilabiliales  | Marinilabiliaceae      | <i>Saccharicrinis</i> | nd                        | -          |
| OTU_17  | 0.00000  | 0.01717 | 0.00425    | 0.01230 | 0.03372 | Proteobacteria | Gammaproteobacteria   | Chromatiales      | Woeseiaceae            | <i>Woeseia</i>        | <i>W. oceani</i>          | -          |
| OTU_21  | 0.02747  | 0.00000 | 0.00000    | 0.00000 | 0.02747 | Tenericutes    | Mollicutes            | Mycoplasmatales   | Mycoplasmataceae       | <i>Mycoplasma</i>     | <i>M. marinum</i>         | -          |
| OTU_16  | 0.00163  | 0.00282 | 0.01772    | 0.00420 | 0.02636 | Proteobacteria | Deltaproteobacteria   | Desulfobacterales | Desulfobulbaceae       | <i>Desulfopila</i>    | nd                        | -          |
| OTU_32  | 0.00000  | 0.00862 | 0.00291    | 0.01381 | 0.02535 | Tenericutes    | Mollicutes            | Mycoplasmatales   | Mycoplasmataceae       | <i>Mycoplasma</i>     | <i>M. marinum</i>         | -          |
| OTU_33  | 0.00804  | 0.00336 | 0.00454    | 0.00707 | 0.02301 | Tenericutes    | Mollicutes            | Mycoplasmatales   | Mycoplasmataceae       | <i>Mycoplasma</i>     | <i>M. marinum</i>         | -          |
| OTU_63  | 0.00000  | 0.00000 | 0.02282    | 0.00000 | 0.02282 | Proteobacteria | Gammaproteobacteria   | Chromatiales      | Ectothiorhodospiraceae | <i>Thiohalomonas</i>  | <i>T. nitratireducens</i> | -          |
| OTU_46  | 0.00000  | 0.01354 | 0.00546    | 0.00372 | 0.02272 | Tenericutes    | Mollicutes            | Mycoplasmatales   | Mycoplasmataceae       | <i>Mycoplasma</i>     | <i>M. marinum</i>         | -          |
| OTU_30  | 0.00296  | 0.00000 | 0.00000    | 0.01954 | 0.02250 | Tenericutes    | Mollicutes            | Mycoplasmatales   | Mycoplasmataceae       | <i>Mycoplasma</i>     | <i>M. mobile</i>          | +          |
| OTU_27  | 0.01732  | 0.00258 | 0.00242    | 0.00000 | 0.02232 | Tenericutes    | Mollicutes            | Mycoplasmatales   | Mycoplasmataceae       | <i>Mycoplasma</i>     | <i>M. marinum</i>         | -          |
| OTU_23  | 0.00000  | 0.00195 | 0.00000    | 0.02028 | 0.02222 | Chlamydiae     | Chlamydiai            | Parachlamydiales  | Criblamydiaceae        | <i>Criblamydia</i>    | <i>C. sequanensis</i>     | -          |
| OTU_28  | 0.00000  | 0.00542 | 0.01661    | 0.00000 | 0.02202 | Bacteroidetes  | Flavobacteriia        | Flavobacteriales  | Flavobacteriaceae      | <i>Tenacibaculum</i>  | nd                        | -          |
| OTU_36  | 0.00575  | 0.00408 | 0.00559    | 0.00629 | 0.02170 | Tenericutes    | Mollicutes            | Mycoplasmatales   | Mycoplasmataceae       | <i>Mycoplasma</i>     | <i>M. marinum</i>         | -          |

|         |         |         |         |         |         |                |                       |                   |                        |                         |                                       |   |
|---------|---------|---------|---------|---------|---------|----------------|-----------------------|-------------------|------------------------|-------------------------|---------------------------------------|---|
| OTU_51  | 0.00000 | 0.01214 | 0.00575 | 0.00364 | 0.02154 | Tenericutes    | Mollicutes            | Mycoplasmatales   | Mycoplasmataceae       | <i>Mycoplasma</i>       | <i>marinum</i>                        | - |
| OTU_40  | 0.00000 | 0.00241 | 0.01442 | 0.00321 | 0.02004 | Actinobacteria | Acidimicrobiia        | Acidimicrobiales  | Ilumatobacteraceae     | <i>Ilumatobacter</i>    | <i>I. fluminis</i>                    | + |
| OTU_34  | 0.00000 | 0.01670 | 0.00000 | 0.00128 | 0.01798 | Spirochaetes   | Spirochaetia          | Spirochaetales    | Spirochaetaceae        | <i>Spirochaeta</i>      | <i>sp.BH180-158</i>                   | - |
| OTU_37  | 0.01282 | 0.00212 | 0.00281 | 0.00000 | 0.01775 | Tenericutes    | Mollicutes            | Mycoplasmatales   | Mycoplasmataceae       | <i>Mycoplasma</i>       | <i>M. marinum</i>                     | - |
| OTU_31  | 0.00000 | 0.00249 | 0.01013 | 0.00411 | 0.01674 | Bacteroidetes  | Flavobacteriia        | Flavobacteriales  | Flavobacteriaceae      | <i>Lutimonas</i>        | <i>L. saemankumensis</i>              | - |
| OTU_26  | 0.00000 | 0.00000 | 0.01461 | 0.00000 | 0.01461 | Proteobacteria | Gammaproteobacteria   | Vibrionales       | Vibrionaceae           | <i>Vibrio</i>           | <i>nd</i>                             | - |
| OTU_49  | 0.00000 | 0.00103 | 0.00814 | 0.00542 | 0.01458 | Proteobacteria | Gammaproteobacteria   | Cellvibrionales   | Haliaceae              | <i>Luminiphilus</i>     | <i>L. sylvensis</i>                   | - |
| OTU_38  | 0.01426 | 0.00000 | 0.00000 | 0.00000 | 0.01426 | Tenericutes    | Mollicutes            | Mycoplasmatales   | Mycoplasmataceae       | <i>Mycoplasma</i>       | <i>sp.VJC358</i>                      | - |
| OTU_25  | 0.00000 | 0.01181 | 0.00000 | 0.00214 | 0.01396 | Bacteroidetes  | Bacteroidia           | Marinilabiales    | Marinilabiliaceae      | <i>Saccharicrinis</i>   | <i>nd</i>                             | - |
| OTU_47  | 0.00000 | 0.00095 | 0.01049 | 0.00235 | 0.01379 | Bacteroidetes  | Flavobacteriia        | Flavobacteriales  | Flavobacteriaceae      | <i>Actibacter</i>       | <i>nd</i>                             | - |
| OTU_41  | 0.01372 | 0.00000 | 0.00000 | 0.00000 | 0.01372 | Tenericutes    | Mollicutes            | Mycoplasmatales   | Mycoplasmataceae       | <i>Mycoplasma</i>       | <i>sp.VJC358</i>                      | - |
| OTU_29  | 0.00000 | 0.00000 | 0.01366 | 0.00000 | 0.01366 | Proteobacteria | Gammaproteobacteria   | Vibrionales       | Vibrionaceae           | <i>Vibrio</i>           | <i>nd</i>                             | - |
| OTU_45  | 0.00000 | 0.00135 | 0.00919 | 0.00263 | 0.01317 | Bacteroidetes  | Flavobacteriia        | Flavobacteriales  | Flavobacteriaceae      | <i>Actibacter</i>       | <i>nd</i>                             | - |
| OTU_58  | 0.00000 | 0.00342 | 0.00000 | 0.00911 | 0.01253 | Tenericutes    | Mollicutes            | Mycoplasmatales   | Mycoplasmataceae       | <i>Mycoplasma</i>       | <i>M. marinum</i>                     | - |
| OTU_62  | 0.00000 | 0.00000 | 0.00801 | 0.00428 | 0.01229 | Proteobacteria | Gammaproteobacteria   | Chromatiales      | Wenzhouxiangellaceae   | <i>Wenzhouxiangella</i> | <i>W. salilacus</i>                   | - |
| OTU_61  | 0.00150 | 0.00209 | 0.00255 | 0.00580 | 0.01193 | Tenericutes    | Mollicutes            | Mycoplasmatales   | Mycoplasmataceae       | <i>Mycoplasma</i>       | <i>M. marinum</i>                     | - |
| OTU_48  | 0.00211 | 0.00300 | 0.00494 | 0.00134 | 0.01139 | Proteobacteria | Gammaproteobacteria   | Thiotrichales     | Fastidiosibacteraceae  | <i>Fangia</i>           | <i>F. hongkongensis</i>               | - |
| OTU_13  | 0.00372 | 0.00400 | 0.00108 | 0.00220 | 0.01100 | Proteobacteria | Gammaproteobacteria   | Vibrionales       | Vibrionaceae           | <i>Vibrio</i>           | <i>nd</i>                             | - |
| OTU_54  | 0.00000 | 0.00112 | 0.00716 | 0.00188 | 0.01016 | Proteobacteria | Deltaproteobacteria   | Desulfobacterales | Desulfobulbaceae       | <i>Desulfopila</i>      | <i>nd</i>                             | - |
| OTU_44  | 0.00107 | 0.00000 | 0.00605 | 0.00266 | 0.00977 | Proteobacteria | Epsilonproteobacteria | Campylobacterales | Helicobacteraceae      | <i>Sulfurovum</i>       | <i>nd</i>                             | - |
| OTU_42  | 0.00386 | 0.00224 | 0.00216 | 0.00122 | 0.00948 | Proteobacteria | Gammaproteobacteria   | Thiotrichales     | Fastidiosibacteraceae  | <i>Cysteiniphilum</i>   | <i>nd</i>                             | - |
| OTU_86  | 0.00000 | 0.00591 | 0.00000 | 0.00326 | 0.00918 | Proteobacteria | Alphaproteobacteria   | Rickettsiales     | Rickettsiaceae         | <i>Rickettsia</i>       | <i>nd</i>                             | - |
| OTU_74  | 0.00293 | 0.00314 | 0.00000 | 0.00308 | 0.00915 | Proteobacteria | Alphaproteobacteria   | Rickettsiales     | Rickettsiaceae         | <i>Rickettsia</i>       | <i>Endosymbiont of Bemisia tabaci</i> | - |
| OTU_133 | 0.00000 | 0.00000 | 0.00909 | 0.00000 | 0.00909 | Proteobacteria | Gammaproteobacteria   | Chromatiales      | Ectothiorhodospiraceae | <i>nd</i>               | <i>nd</i>                             | - |
| OTU_65  | 0.00000 | 0.00265 | 0.00454 | 0.00186 | 0.00905 | Actinobacteria | Acidimicrobiia        | Acidimicrobiales  | Ilumatobacteraceae     | <i>Ilumatobacter</i>    | <i>I. nonamiensis</i>                 | + |
| OTU_35  | 0.00135 | 0.00199 | 0.00101 | 0.00451 | 0.00886 | Bacteroidetes  | Bacteroidia           | Marinilabiales    | Marinilabiliaceae      | <i>Labilibacter</i>     | <i>L. marinus</i>                     | - |
| OTU_67  | 0.00000 | 0.00269 | 0.00209 | 0.00387 | 0.00865 | Tenericutes    | Mollicutes            | Entomoplasmatales | Spiroplasmataceae      | <i>Spiroplasma</i>      | <i>S. platyhelix</i>                  | + |
| OTU_88  | 0.00000 | 0.00000 | 0.00297 | 0.00532 | 0.00829 | Tenericutes    | Mollicutes            | Mycoplasmatales   | Mycoplasmataceae       | <i>Mycoplasma</i>       | <i>M. marinum</i>                     | - |
| OTU_18  | 0.00818 | 0.00000 | 0.00000 | 0.00000 | 0.00818 | Proteobacteria | Gammaproteobacteria   | Pseudomonadales   | Pseudomonadaceae       | <i>Pseudomonas</i>      | <i>nd</i>                             | - |
| OTU_43  | 0.00000 | 0.00414 | 0.00000 | 0.00384 | 0.00798 | Proteobacteria | Epsilonproteobacteria | Campylobacterales | Campylobacteraceae     | <i>Sulfurospirillum</i> | <i>S. carboxydovorans</i>             | - |
| OTU_52  | 0.00000 | 0.00629 | 0.00000 | 0.00137 | 0.00765 | Bacteroidetes  | Bacteroidia           | Marinilabiales    | Marinilabiliaceae      | <i>Saccharicrinis</i>   | <i>nd</i>                             | - |
| OTU_107 | 0.00000 | 0.00000 | 0.00346 | 0.00379 | 0.00726 | Tenericutes    | Mollicutes            | Mycoplasmatales   | Mycoplasmataceae       | <i>Mycoplasma</i>       | <i>M. marinum</i>                     | - |
| OTU_82  | 0.00000 | 0.00000 | 0.00438 | 0.00254 | 0.00692 | Actinobacteria | Acidimicrobiia        | Acidimicrobiales  | Ilumatobacteraceae     | <i>Ilumatobacter</i>    | <i>I. fluminis</i>                    | + |

|         |         |         |         |         |         |                |                       |                    |                     |                               |                         |   |
|---------|---------|---------|---------|---------|---------|----------------|-----------------------|--------------------|---------------------|-------------------------------|-------------------------|---|
| OTU_57  | 0.00413 | 0.00000 | 0.00000 | 0.00228 | 0.00640 | Bacteroidetes  | Flavobacteriia        | Flavobacteriales   | Flavobacteriaceae   | <i>Polaribacter</i>           | nd                      | - |
| OTU_95  | 0.00000 | 0.00125 | 0.00000 | 0.00510 | 0.00634 | Tenericutes    | Mollicutes            | Mycoplasmatales    | Mycoplasmataceae    | <i>Mycoplasma</i>             | <i>M. marinum</i>       | - |
| OTU_97  | 0.00000 | 0.00135 | 0.00000 | 0.00492 | 0.00628 | Tenericutes    | Mollicutes            | Mycoplasmatales    | Mycoplasmataceae    | <i>Mycoplasma</i>             | <i>M. marinum</i>       | - |
| OTU_59  | 0.00000 | 0.00100 | 0.00526 | 0.00000 | 0.00626 | Fusobacteria   | Fusobacteriia         | Fusobacteriales    | Fusobacteriaceae    | <i>Ilyobacter</i>             | <i>I. psychrophilus</i> | - |
| OTU_22  | 0.00306 | 0.00195 | 0.00000 | 0.00118 | 0.00619 | Proteobacteria | Gammaproteobacteria   | Vibrionales        | Vibrionaceae        | <i>Vibrio</i>                 | nd                      | - |
| OTU_100 | 0.00000 | 0.00075 | 0.00536 | 0.00000 | 0.00611 | Bacteroidetes  | Flavobacteriia        | Flavobacteriales   | Weeksellaceae       | <i>Spongiimonas</i>           | <i>S. flava</i>         | - |
| OTU_68  | 0.00000 | 0.00000 | 0.00386 | 0.00224 | 0.00610 | Proteobacteria | Alphaproteobacteria   | Rhodobacteriales   | Rhodobacteraceae    | <i>Roseobacter</i>            | <i>R. denitrificans</i> | - |
| OTU_94  | 0.00000 | 0.00000 | 0.00000 | 0.00609 | 0.00609 | Tenericutes    | Mollicutes            | Mycoplasmatales    | Mycoplasmataceae    | <i>Mycoplasma</i>             | <i>M. marinum</i>       | - |
| OTU_99  | 0.00000 | 0.00000 | 0.00441 | 0.00166 | 0.00607 | Proteobacteria | Gammaproteobacteria   | Cellvibrionales    | Haliaceae           | nd                            | nd                      | - |
| OTU_39  | 0.00000 | 0.00378 | 0.00000 | 0.00225 | 0.00604 | Proteobacteria | Gammaproteobacteria   | Oceanospirillales  | Endozoicomonadaceae | <i>Endozoicomonas</i>         | <i>E. ascidiicola</i>   | - |
| OTU_223 | 0.00000 | 0.00000 | 0.00588 | 0.00000 | 0.00588 | Actinobacteria | Nitiliruptoria        | Egibacteriales     | Egibacteraceae      | <i>Egibacter</i>              | <i>E. rhizosphaerae</i> | - |
| OTU_75  | 0.00583 | 0.00000 | 0.00000 | 0.00000 | 0.00583 | Tenericutes    | Mollicutes            | Mycoplasmatales    | Mycoplasmataceae    | <i>Mycoplasma</i>             | <i>M. marinum</i>       | - |
| OTU_55  | 0.00000 | 0.00375 | 0.00000 | 0.00204 | 0.00579 | Proteobacteria | Deltaproteobacteria   | Desulfobacteriales | Desulfobulbaceae    | <i>CandidatusElectrothrix</i> | <i>C.E. japonica</i>    | - |
| OTU_122 | 0.00000 | 0.00556 | 0.00000 | 0.00000 | 0.00556 | Tenericutes    | Mollicutes            | Mycoplasmatales    | Mycoplasmataceae    | <i>Mycoplasma</i>             | <i>M. marinum</i>       | - |
| OTU_83  | 0.00544 | 0.00000 | 0.00000 | 0.00000 | 0.00544 | Tenericutes    | Mollicutes            | Mycoplasmatales    | Mycoplasmataceae    | <i>Mycoplasma</i>             | <i>M. marinum</i>       | - |
| OTU_92  | 0.00000 | 0.00000 | 0.00441 | 0.00102 | 0.00543 | Bacteroidetes  | Flavobacteriia        | Flavobacteriales   | Flavobacteriaceae   | <i>Lutimonas</i>              | <i>L. vermicola</i>     | - |
| OTU_160 | 0.00000 | 0.00097 | 0.00438 | 0.00000 | 0.00535 | Proteobacteria | Alphaproteobacteria   | Rhizobiales        | Hyphomicrobiaceae   | <i>Filomicrobium</i>          | nd                      | - |
| OTU_84  | 0.00534 | 0.00000 | 0.00000 | 0.00000 | 0.00534 | Tenericutes    | Mollicutes            | Mycoplasmatales    | Mycoplasmataceae    | <i>Mycoplasma</i>             | <i>M. marinum</i>       | - |
| OTU_128 | 0.00000 | 0.00520 | 0.00000 | 0.00000 | 0.00520 | Tenericutes    | Mollicutes            | Mycoplasmatales    | Mycoplasmataceae    | <i>Mycoplasma</i>             | <i>M. marinum</i>       | - |
| OTU_66  | 0.00000 | 0.00000 | 0.00507 | 0.00000 | 0.00507 | Proteobacteria | Gammaproteobacteria   | Vibrionales        | Vibrionaceae        | <i>Vibrio</i>                 | nd                      | - |
| OTU_93  | 0.00494 | 0.00000 | 0.00000 | 0.00000 | 0.00494 | Tenericutes    | Mollicutes            | Mycoplasmatales    | Mycoplasmataceae    | <i>Mycoplasma</i>             | <i>M. marinum</i>       | - |
| OTU_50  | 0.00000 | 0.00403 | 0.00000 | 0.00080 | 0.00483 | Proteobacteria | Epsilonproteobacteria | Campylobacteriales | Campylobacteraceae  | <i>Arcobacter</i>             | nd                      | - |
| OTU_116 | 0.00000 | 0.00000 | 0.00000 | 0.00481 | 0.00481 | Tenericutes    | Mollicutes            | Mycoplasmatales    | Mycoplasmataceae    | <i>Mycoplasma</i>             | <i>M. marinum</i>       | - |
| OTU_139 | 0.00000 | 0.00475 | 0.00000 | 0.00000 | 0.00475 | Tenericutes    | Mollicutes            | Mycoplasmatales    | Mycoplasmataceae    | <i>Mycoplasma</i>             | <i>M. marinum</i>       | - |
| OTU_130 | 0.00000 | 0.00000 | 0.00471 | 0.00000 | 0.00471 | Proteobacteria | Alphaproteobacteria   | Rhodobacteriales   | Rhodobacteraceae    | <i>Roseobacter</i>            | <i>R. denitrificans</i> | - |
| OTU_114 | 0.00168 | 0.00114 | 0.00000 | 0.00188 | 0.00470 | Tenericutes    | Mollicutes            | Mycoplasmatales    | Mycoplasmataceae    | <i>Mycoplasma</i>             | <i>M. marinum</i>       | - |
| OTU_53  | 0.00000 | 0.00372 | 0.00000 | 0.00095 | 0.00467 | Fusobacteria   | Fusobacteriia         | Fusobacteriales    | Fusobacteriaceae    | <i>Psychrilyobacter</i>       | nd                      | - |
| OTU_132 | 0.00000 | 0.00000 | 0.00464 | 0.00000 | 0.00464 | Proteobacteria | Alphaproteobacteria   | Rhodobacteriales   | Rhodobacteraceae    | <i>Roseobacter</i>            | <i>R. sp. p28</i>       | - |
| OTU_142 | 0.00000 | 0.00464 | 0.00000 | 0.00000 | 0.00464 | Tenericutes    | Mollicutes            | Mycoplasmatales    | Mycoplasmataceae    | <i>Mycoplasma</i>             | <i>M. marinum</i>       | - |
| OTU_70  | 0.00000 | 0.00000 | 0.00461 | 0.00000 | 0.00461 | Proteobacteria | Gammaproteobacteria   | Vibrionales        | Vibrionaceae        | <i>Vibrio</i>                 | nd                      | - |
| OTU_101 | 0.00430 | 0.00000 | 0.00000 | 0.00000 | 0.00430 | Tenericutes    | Mollicutes            | Mycoplasmatales    | Mycoplasmataceae    | <i>Mycoplasma</i>             | <i>M. marinum</i>       | - |
| OTU_103 | 0.00419 | 0.00000 | 0.00000 | 0.00000 | 0.00419 | Tenericutes    | Mollicutes            | Mycoplasmatales    | Mycoplasmataceae    | <i>Mycoplasma</i>             | <i>M. marinum</i>       | - |
| OTU_104 | 0.00415 | 0.00000 | 0.00000 | 0.00000 | 0.00415 | Tenericutes    | Mollicutes            | Mycoplasmatales    | Mycoplasmataceae    | <i>Mycoplasma</i>             | <i>M. marinum</i>       | - |

|         |         |         |         |         |         |                |                       |                    |                     |                          |                             |   |
|---------|---------|---------|---------|---------|---------|----------------|-----------------------|--------------------|---------------------|--------------------------|-----------------------------|---|
| OTU_106 | 0.00410 | 0.00000 | 0.00000 | 0.00000 | 0.00410 | Tenericutes    | Mollicutes            | Mycoplasmatales    | Mycoplasmataceae    | <i>Mycoplasma</i>        | <i>M. marinum</i>           | - |
| OTU_108 | 0.00409 | 0.00000 | 0.00000 | 0.00000 | 0.00409 | Tenericutes    | Mollicutes            | Mycoplasmatales    | Mycoplasmataceae    | <i>Mycoplasma</i>        | <i>M. marinum</i>           | - |
| OTU_193 | 0.00000 | 0.00000 | 0.00409 | 0.00000 | 0.00409 | Proteobacteria | Gammaproteobacteria   | Chromatiales       | Thioalkalspiraceae  | <i>Thiohalophilus</i>    | <i>T. thiocyanatoxydans</i> | - |
| OTU_143 | 0.00000 | 0.00000 | 0.00409 | 0.00000 | 0.00409 | Proteobacteria | Alphaproteobacteria   | Rhodobacterales    | Rhodobacteraceae    | <i>Tateyamaria</i>       | nd                          | - |
| OTU_76  | 0.00000 | 0.00000 | 0.00405 | 0.00000 | 0.00405 | Proteobacteria | Gammaproteobacteria   | Vibrionales        | Vibrionaceae        | <i>Vibrio</i>            | nd                          | - |
| OTU_71  | 0.00000 | 0.00405 | 0.00000 | 0.00000 | 0.00405 | Bacteroidetes  | Bacteroidia           | Marinilabiales     | Marinifilaceae      | <i>Ancylomarina</i>      | <i>A. subtilis</i>          | - |
| OTU_120 | 0.00000 | 0.00000 | 0.00317 | 0.00079 | 0.00396 | Bacteroidetes  | Flavobacteriia        | Flavobacteriales   | Flavobacteriaceae   | <i>Lutimonas</i>         | nd                          | - |
| OTU_169 | 0.00000 | 0.00000 | 0.00392 | 0.00000 | 0.00392 | Proteobacteria | Gammaproteobacteria   | Cellvibrionales    | Haliaceae           | <i>Haliëa</i>            | <i>H. sp.SY02</i>           | - |
| OTU_171 | 0.00000 | 0.00388 | 0.00000 | 0.00000 | 0.00388 | Proteobacteria | Alphaproteobacteria   | Rickettsiales      | Rickettsiaceae      | <i>CandidatusMegaira</i> | <i>C.M. sp.OL-2017</i>      | - |
| OTU_60  | 0.00065 | 0.00097 | 0.00075 | 0.00143 | 0.00380 | Proteobacteria | Epsilonproteobacteria | Campylobacterales  | Campylobacteraceae  | <i>Arcobacter</i>        | <i>A. nitrofigilis</i>      | - |
| OTU_118 | 0.00374 | 0.00000 | 0.00000 | 0.00000 | 0.00374 | Tenericutes    | Mollicutes            | Mycoplasmatales    | Mycoplasmataceae    | <i>Mycoplasma</i>        | <i>M. sp.VJC358</i>         | - |
| OTU_78  | 0.00000 | 0.00370 | 0.00000 | 0.00000 | 0.00370 | Bacteroidetes  | Bacteroidia           | Marinilabiales     | Marinifilaceae      | <i>Ancylomarina</i>      | <i>A. salipaludis</i>       | - |
| OTU_72  | 0.00000 | 0.00367 | 0.00000 | 0.00000 | 0.00367 | Proteobacteria | Deltaproteobacteria   | Desulfovibrionales | Desulfovibrionaceae | <i>Desulfovibrio</i>     | <i>D. sp.La1.3</i>          | - |
| OTU_205 | 0.00000 | 0.00000 | 0.00363 | 0.00000 | 0.00363 | Proteobacteria | Gammaproteobacteria   | Chromatiales       | Chromatiaceae       | nd                       | nd                          | - |
| OTU_81  | 0.00000 | 0.00223 | 0.00000 | 0.00138 | 0.00360 | Firmicutes     | Clostridia            | Clostridiales      | Lachnospiraceae     | <i>Niameybacter</i>      | <i>N. massiliensis</i>      | + |
| OTU_157 | 0.00000 | 0.00352 | 0.00000 | 0.00000 | 0.00352 | Tenericutes    | Mollicutes            | Mycoplasmatales    | Mycoplasmataceae    | <i>Mycoplasma</i>        | <i>M. marinum</i>           | - |
| OTU_123 | 0.00346 | 0.00000 | 0.00000 | 0.00000 | 0.00346 | Tenericutes    | Mollicutes            | Mycoplasmatales    | Mycoplasmataceae    | <i>Mycoplasma</i>        | <i>M. marinum</i>           | - |
| OTU_79  | 0.00000 | 0.00257 | 0.00000 | 0.00086 | 0.00343 | Bacteroidetes  | Bacteroidia           | Bacteroidales      | Bacteroidaceae      | <i>Bacteroides</i>       | <i>B. graminisolvens</i>    | - |
| OTU_77  | 0.00000 | 0.00000 | 0.00144 | 0.00196 | 0.00340 | Proteobacteria | Deltaproteobacteria   | Desulfobacterales  | Desulfobacteraceae  | nd                       | nd                          | - |
| OTU_126 | 0.00334 | 0.00000 | 0.00000 | 0.00000 | 0.00334 | Tenericutes    | Mollicutes            | Mycoplasmatales    | Mycoplasmataceae    | <i>Mycoplasma</i>        | <i>M. marinum</i>           | - |
| OTU_147 | 0.00000 | 0.00000 | 0.00000 | 0.00326 | 0.00326 | Tenericutes    | Mollicutes            | Mycoplasmatales    | Mycoplasmataceae    | <i>Mycoplasma</i>        | <i>M. marinum</i>           | - |
| OTU_131 | 0.00320 | 0.00000 | 0.00000 | 0.00000 | 0.00320 | Tenericutes    | Mollicutes            | Mycoplasmatales    | Mycoplasmataceae    | <i>Mycoplasma</i>        | <i>M. marinum</i>           | - |
| OTU_170 | 0.00000 | 0.00319 | 0.00000 | 0.00000 | 0.00319 | Tenericutes    | Mollicutes            | Mycoplasmatales    | Mycoplasmataceae    | <i>Mycoplasma</i>        | <i>M. marinum</i>           | - |
| OTU_134 | 0.00318 | 0.00000 | 0.00000 | 0.00000 | 0.00318 | Tenericutes    | Mollicutes            | Mycoplasmatales    | Mycoplasmataceae    | <i>Mycoplasma</i>        | <i>M. marinum</i>           | - |
| OTU_113 | 0.00000 | 0.00182 | 0.00000 | 0.00135 | 0.00318 | Actinobacteria | Actinobacteria        | Geodermatophilales | Geodermatophilaceae | <i>Modestobacter</i>     | <i>M. versicolor</i>        | + |
| OTU_102 | 0.00000 | 0.00314 | 0.00000 | 0.00000 | 0.00314 | Bacteroidetes  | Cytophagia            | Cytophagales       | Cytophagaceae       | <i>Cytophaga</i>         | <i>C. sp.N05VI</i>          | - |
| OTU_135 | 0.00314 | 0.00000 | 0.00000 | 0.00000 | 0.00314 | Tenericutes    | Mollicutes            | Mycoplasmatales    | Mycoplasmataceae    | <i>Mycoplasma</i>        | <i>M. marinum</i>           | - |
| OTU_243 | 0.00000 | 0.00000 | 0.00314 | 0.00000 | 0.00314 | Proteobacteria | Gammaproteobacteria   | Chromatiales       | nd                  | nd                       | nd                          | - |
| OTU_136 | 0.00312 | 0.00000 | 0.00000 | 0.00000 | 0.00312 | Tenericutes    | Mollicutes            | Mycoplasmatales    | Mycoplasmataceae    | <i>Mycoplasma</i>        | <i>M. marinum</i>           | - |
| OTU_221 | 0.00000 | 0.00000 | 0.00301 | 0.00000 | 0.00301 | Actinobacteria | Acidimicrobiia        | Acidimicrobiales   | Ilumatobacteraceae  | <i>Ilumatobacter</i>     | <i>I. nonamiensis</i>       | + |
| OTU_91  | 0.00292 | 0.00000 | 0.00000 | 0.00000 | 0.00292 | Proteobacteria | Gammaproteobacteria   | Enterobacterales   | Yersiniaceae        | <i>Serratia</i>          | nd                          | - |
| OTU_69  | 0.00292 | 0.00000 | 0.00000 | 0.00000 | 0.00292 | Proteobacteria | Oligoflexia           | Silvanigrellales   | Silvanigrellaceae   | <i>Silvanigrella</i>     | <i>S. aquatica</i>          | - |
| OTU_98  | 0.00000 | 0.00285 | 0.00000 | 0.00000 | 0.00285 | Proteobacteria | Deltaproteobacteria   | Desulfovibrionales | Desulfovibrionaceae | <i>Desulfovibrio</i>     | <i>D. sp.La1.3</i>          | - |

Efficiency Comparison of DNA Extraction Kits for Analysing the Cocker Gut Bacteriome

Lourenço, C. F., Almeida, A. R., Soares, A. M. V. M., and Marques, C. R.

|         |         |         |         |         |         |                |                       |                       |                        |                            |                           |   |
|---------|---------|---------|---------|---------|---------|----------------|-----------------------|-----------------------|------------------------|----------------------------|---------------------------|---|
| OTU_80  | 0.00000 | 0.00097 | 0.00088 | 0.00100 | 0.00284 | Proteobacteria | Gammaproteobacteria   | Oceanospirillales     | Endozoicomonadaceae    | <i>Endozoicomonas</i>      | nd                        | - |
| OTU_229 | 0.00000 | 0.00000 | 0.00284 | 0.00000 | 0.00284 | Actinobacteria | Acidimicrobiia        | Acidimicrobiales      | Ilumatobacteraceae     | <i>Ilumatobacter</i>       | <i>I. fluminis</i>        | + |
| OTU_224 | 0.00000 | 0.00000 | 0.00281 | 0.00000 | 0.00281 | Proteobacteria | Gammaproteobacteria   | nd                    | nd                     | <i>Thiolapillus</i>        | <i>T. brandeum</i>        | - |
| OTU_232 | 0.00000 | 0.00000 | 0.00271 | 0.00000 | 0.00271 | Proteobacteria | Gammaproteobacteria   | Cellvibrionales       | Haliaceae              | <i>Marimicrobium</i>       | <i>M. arenosum</i>        | - |
| OTU_200 | 0.00000 | 0.00269 | 0.00000 | 0.00000 | 0.00269 | Tenericutes    | Mollicutes            | Mycoplasmatales       | Mycoplasmataceae       | <i>Mycoplasma</i>          | <i>M. marinum</i>         | - |
| OTU_295 | 0.00000 | 0.00000 | 0.00268 | 0.00000 | 0.00268 | Proteobacteria | Gammaproteobacteria   | Chromatiales          | Ectothiorhodospiraceae | <i>Inmirania</i>           | <i>I. thermothiophila</i> | - |
| OTU_183 | 0.00000 | 0.00000 | 0.00265 | 0.00000 | 0.00265 | Bacteroidetes  | Flavobacteriia        | Flavobacteriales      | Flavobacteriaceae      | nd                         | nd                        | - |
| OTU_241 | 0.00000 | 0.00000 | 0.00262 | 0.00000 | 0.00262 | Proteobacteria | Gammaproteobacteria   | Cellvibrionales       | Haliaceae              | <i>Halioglobus</i>         | <i>H. sediminis</i>       | - |
| OTU_148 | 0.00261 | 0.00000 | 0.00000 | 0.00000 | 0.00261 | Tenericutes    | Mollicutes            | Mycoplasmatales       | Mycoplasmataceae       | <i>Mycoplasma</i>          | <i>M. marinum</i>         | - |
| OTU_275 | 0.00000 | 0.00000 | 0.00255 | 0.00000 | 0.00255 | Proteobacteria | Gammaproteobacteria   | Chromatiales          | nd                     | nd                         | nd                        | - |
| OTU_313 | 0.00000 | 0.00000 | 0.00252 | 0.00000 | 0.00252 | Acidobacteria  | Thermoanaerobaculia   | Thermoanaerobaculales | Thermoanaerobaculaceae | <i>Thermoanaerobaculum</i> | <i>T. aquaticum</i>       | - |
| OTU_172 | 0.00000 | 0.00000 | 0.00252 | 0.00000 | 0.00252 | Proteobacteria | Epsilonproteobacteria | Campylobacterales     | Helicobacteraceae      | <i>Sulfurovum</i>          | nd                        | - |
| OTU_173 | 0.00000 | 0.00000 | 0.00000 | 0.00251 | 0.00251 | Tenericutes    | Mollicutes            | Mycoplasmatales       | Mycoplasmataceae       | <i>Mycoplasma</i>          | <i>M. marinum</i>         | - |
| OTU_271 | 0.00000 | 0.00000 | 0.00248 | 0.00000 | 0.00248 | Proteobacteria | Gammaproteobacteria   | Chromatiales          | Chromatiaceae          | <i>Halochromatium</i>      | <i>H. glycolicum</i>      | - |
| OTU_250 | 0.00000 | 0.00000 | 0.00248 | 0.00000 | 0.00248 | Proteobacteria | Gammaproteobacteria   | Cellvibrionales       | Haliaceae              | nd                         | nd                        | - |
| OTU_236 | 0.00000 | 0.00000 | 0.00245 | 0.00000 | 0.00245 | Proteobacteria | Alphaproteobacteria   | Rhizobiales           | Rhodobiaceae           | <i>Andersenella</i>        | <i>A. baltica</i>         | - |
| OTU_198 | 0.00000 | 0.00000 | 0.00245 | 0.00000 | 0.00245 | Bacteroidetes  | Flavobacteriia        | Flavobacteriales      | Flavobacteriaceae      | <i>Actibacter</i>          | nd                        | - |
| OTU_272 | 0.00000 | 0.00000 | 0.00245 | 0.00000 | 0.00245 | Proteobacteria | Gammaproteobacteria   | Chromatiales          | Chromatiaceae          | <i>Thiohalocapsa</i>       | <i>T. halophila</i>       | - |
| OTU_176 | 0.00000 | 0.00000 | 0.00000 | 0.00244 | 0.00244 | Tenericutes    | Mollicutes            | Mycoplasmatales       | Mycoplasmataceae       | <i>Mycoplasma</i>          | <i>M. marinum</i>         | - |
| OTU_73  | 0.00000 | 0.00087 | 0.00000 | 0.00156 | 0.00244 | Proteobacteria | Gammaproteobacteria   | Oceanospirillales     | Endozoicomonadaceae    | <i>Kistimonas</i>          | <i>K. sp.1804</i>         | - |
| OTU_276 | 0.00000 | 0.00000 | 0.00242 | 0.00000 | 0.00242 | Proteobacteria | Gammaproteobacteria   | Chromatiales          | Chromatiaceae          | <i>Halochromatium</i>      | <i>glycolicum</i>         | - |
| OTU_216 | 0.00000 | 0.00241 | 0.00000 | 0.00000 | 0.00241 | Tenericutes    | Mollicutes            | Mycoplasmatales       | Mycoplasmataceae       | <i>Mycoplasma</i>          | <i>M. marinum</i>         | - |
| OTU_56  | 0.00164 | 0.00076 | 0.00000 | 0.00000 | 0.00240 | Proteobacteria | Gammaproteobacteria   | Vibrionales           | Vibrionaceae           | <i>Vibrio</i>              | nd                        | - |
| OTU_211 | 0.00000 | 0.00000 | 0.00000 | 0.00239 | 0.00239 | Proteobacteria | Alphaproteobacteria   | Rickettsiales         | Anaplasmataceae        | <i>Anaplasma</i>           | <i>A. phagocytophilum</i> | - |
| OTU_282 | 0.00000 | 0.00000 | 0.00239 | 0.00000 | 0.00239 | Proteobacteria | Gammaproteobacteria   | Chromatiales          | Wenzhouxiangellaceae   | <i>Wenzhouxiangella</i>    | nd                        | - |
| OTU_129 | 0.00000 | 0.00000 | 0.00000 | 0.00236 | 0.00236 | Proteobacteria | Gammaproteobacteria   | Cellvibrionales       | Microbulbiferaceae     | <i>Microbulbifer</i>       | <i>M. okinawensis</i>     | - |
| OTU_305 | 0.00000 | 0.00000 | 0.00235 | 0.00000 | 0.00235 | Proteobacteria | Gammaproteobacteria   | Chromatiales          | Ectothiorhodospiraceae | <i>Thiohalomonas</i>       | <i>T. nitritireducens</i> | - |
| OTU_256 | 0.00000 | 0.00235 | 0.00000 | 0.00000 | 0.00235 | Proteobacteria | Alphaproteobacteria   | Rickettsiales         | Rickettsiaceae         | <i>Rickettsia</i>          | nd                        | - |
| OTU_85  | 0.00230 | 0.00000 | 0.00000 | 0.00000 | 0.00230 | Bacteroidetes  | Flavobacteriia        | Flavobacteriales      | Flavobacteriaceae      | <i>Lutibacter</i>          | <i>L. holmesii</i>        | - |
| OTU_155 | 0.00229 | 0.00000 | 0.00000 | 0.00000 | 0.00229 | Tenericutes    | Mollicutes            | Mycoplasmatales       | Mycoplasmataceae       | <i>Mycoplasma</i>          | <i>M. marinum</i>         | - |
| OTU_213 | 0.00000 | 0.00000 | 0.00229 | 0.00000 | 0.00229 | Proteobacteria | Alphaproteobacteria   | Rhodobacterales       | Rhodobacteraceae       | <i>Marivita</i>            | <i>M. sp.AC122-G30</i>    | - |
| OTU_87  | 0.00228 | 0.00000 | 0.00000 | 0.00000 | 0.00228 | Proteobacteria | Alphaproteobacteria   | Rhodobacterales       | Rhodobacteraceae       | nd                         | nd                        | - |
| OTU_186 | 0.00000 | 0.00000 | 0.00000 | 0.00225 | 0.00225 | Tenericutes    | Mollicutes            | Mycoplasmatales       | Mycoplasmataceae       | <i>Mycoplasma</i>          | <i>M. marinum</i>         | - |



Efficiency Comparison of DNA Extraction Kits for Analysing the Cockle Gut Bacteriome

Lourenço, C. F., Almeida, A. R., Soares, A. M. V. M., and Marques, C. R.

|         |         |         |         |         |         |                |                       |                   |                      |                         |                        |   |
|---------|---------|---------|---------|---------|---------|----------------|-----------------------|-------------------|----------------------|-------------------------|------------------------|---|
| OTU_156 | 0.00225 | 0.00000 | 0.00000 | 0.00000 | 0.00225 | Tenericutes    | Mollicutes            | Mycoplasmatales   | Mycoplasmataceae     | <i>Mycoplasma</i>       | <i>M. marinum</i>      | - |
| OTU_178 | 0.00000 | 0.00000 | 0.00222 | 0.00000 | 0.00222 | Proteobacteria | Deltaproteobacteria   | Desulfobacterales | Desulfobacteraceae   | <i>Desulfosarcina</i>   | <i>D. alkanivorans</i> | - |
| OTU_89  | 0.00222 | 0.00000 | 0.00000 | 0.00000 | 0.00222 | Bacteroidetes  | Flavobacteriia        | Flavobacteriales  | Flavobacteriaceae    | <i>Tenacibaculum</i>    | <i>T. sp.MED341</i>    | - |
| OTU_231 | 0.00000 | 0.00221 | 0.00000 | 0.00000 | 0.00221 | Tenericutes    | Mollicutes            | Mycoplasmatales   | Mycoplasmataceae     | <i>Mycoplasma</i>       | <i>M. marinum</i>      | - |
| OTU_125 | 0.00117 | 0.00000 | 0.00000 | 0.00103 | 0.00221 | Proteobacteria | Gammaproteobacteria   | Cellvibrionales   | Haliaceae            | nd                      | nd                     | - |
| OTU_325 | 0.00000 | 0.00000 | 0.00216 | 0.00000 | 0.00216 | Tenericutes    | Mollicutes            | Mycoplasmatales   | Mycoplasmataceae     | <i>Mycoplasma</i>       | <i>M. marinum</i>      | - |
| OTU_162 | 0.00215 | 0.00000 | 0.00000 | 0.00000 | 0.00215 | Tenericutes    | Mollicutes            | Mycoplasmatales   | Mycoplasmataceae     | <i>Mycoplasma</i>       | <i>M. marinum</i>      | - |
| OTU_222 | 0.00000 | 0.00000 | 0.00212 | 0.00000 | 0.00212 | Bacteroidetes  | Flavobacteriia        | Flavobacteriales  | Flavobacteriaceae    | <i>Lutimonas</i>        | <i>L. sp.MOLA107</i>   | - |
| OTU_105 | 0.00129 | 0.00000 | 0.00000 | 0.00080 | 0.00209 | Bacteroidetes  | nd                    | nd                | nd                   | nd                      | nd                     | - |
| OTU_298 | 0.00000 | 0.00000 | 0.00209 | 0.00000 | 0.00209 | Proteobacteria | Gammaproteobacteria   | Chromatiales      | Woeseiaceae          | <i>Woeseia</i>          | <i>W. oceani</i>       | - |
| OTU_163 | 0.00207 | 0.00000 | 0.00000 | 0.00000 | 0.00207 | Tenericutes    | Mollicutes            | Mycoplasmatales   | Mycoplasmataceae     | <i>Mycoplasma</i>       | <i>M. marinum</i>      | - |
| OTU_164 | 0.00207 | 0.00000 | 0.00000 | 0.00000 | 0.00207 | Tenericutes    | Mollicutes            | Mycoplasmatales   | Mycoplasmataceae     | <i>Mycoplasma</i>       | <i>M. marinum</i>      | - |
| OTU_165 | 0.00206 | 0.00000 | 0.00000 | 0.00000 | 0.00206 | Tenericutes    | Mollicutes            | Mycoplasmatales   | Mycoplasmataceae     | <i>Mycoplasma</i>       | <i>M. marinum</i>      | - |
| OTU_227 | 0.00000 | 0.00000 | 0.00206 | 0.00000 | 0.00206 | Bacteroidetes  | Flavobacteriia        | Flavobacteriales  | Flavobacteriaceae    | <i>Lutimonas</i>        | <i>L. sp.KHS05</i>     | - |
| OTU_279 | 0.00000 | 0.00000 | 0.00206 | 0.00000 | 0.00206 | Proteobacteria | Gammaproteobacteria   | Arenicellales     | Arenicellaceae       | <i>Arenicella</i>       | nd                     | - |
| OTU_109 | 0.00127 | 0.00000 | 0.00000 | 0.00078 | 0.00205 | Bacteroidetes  | nd                    | nd                | nd                   | nd                      | nd                     | - |
| OTU_167 | 0.00204 | 0.00000 | 0.00000 | 0.00000 | 0.00204 | Tenericutes    | Mollicutes            | Mycoplasmatales   | Mycoplasmataceae     | <i>Mycoplasma</i>       | <i>M. marinum</i>      | - |
| OTU_203 | 0.00000 | 0.00000 | 0.00203 | 0.00000 | 0.00203 | Proteobacteria | Epsilonproteobacteria | Campylobacterales | Helicobacteraceae    | <i>Sulfurovum</i>       | nd                     | - |
| OTU_168 | 0.00202 | 0.00000 | 0.00000 | 0.00000 | 0.00202 | Tenericutes    | Mollicutes            | Mycoplasmatales   | Mycoplasmataceae     | <i>Mycoplasma</i>       | <i>M. marinum</i>      | - |
| OTU_299 | 0.00000 | 0.00000 | 0.00199 | 0.00000 | 0.00199 | Proteobacteria | Gammaproteobacteria   | Chromatiales      | Chromatiaceae        | nd                      | nd                     | - |
| OTU_253 | 0.00000 | 0.00199 | 0.00000 | 0.00000 | 0.00199 | Tenericutes    | Mollicutes            | Mycoplasmatales   | Mycoplasmataceae     | <i>Mycoplasma</i>       | <i>M. marinum</i>      | - |
| OTU_294 | 0.00000 | 0.00000 | 0.00196 | 0.00000 | 0.00196 | Proteobacteria | Deltaproteobacteria   | Desulfobacterales | Desulfobulbaceae     | <i>Desulfobulbus</i>    | nd                     | - |
| OTU_303 | 0.00000 | 0.00000 | 0.00196 | 0.00000 | 0.00196 | Proteobacteria | Gammaproteobacteria   | Chromatiales      | Wenzhouxiangellaceae | <i>Wenzhouxiangella</i> | nd                     | - |
| OTU_310 | 0.00000 | 0.00000 | 0.00186 | 0.00000 | 0.00186 | Proteobacteria | Gammaproteobacteria   | Chromatiales      | Wenzhouxiangellaceae | <i>Wenzhouxiangella</i> | nd                     | - |
| OTU_290 | 0.00000 | 0.00000 | 0.00186 | 0.00000 | 0.00186 | Actinobacteria | Actinobacteria        | Streptomycetales  | Streptomycetaceae    | <i>Streptomyces</i>     | <i>S. aomiensis</i>    | + |
| OTU_140 | 0.00000 | 0.00185 | 0.00000 | 0.00000 | 0.00185 | Proteobacteria | Deltaproteobacteria   | Desulfobacterales | Desulfobulbaceae     | <i>Desulfopila</i>      | <i>D. sp.PR8_E11</i>   | - |
| OTU_182 | 0.00185 | 0.00000 | 0.00000 | 0.00000 | 0.00185 | Tenericutes    | Mollicutes            | Mycoplasmatales   | Mycoplasmataceae     | <i>Mycoplasma</i>       | <i>M. sp.VJC358</i>    | - |
| OTU_296 | 0.00000 | 0.00000 | 0.00183 | 0.00000 | 0.00183 | Proteobacteria | Gammaproteobacteria   | Cellvibrionales   | Haliaceae            | nd                      | nd                     | - |
| OTU_254 | 0.00000 | 0.00000 | 0.00183 | 0.00000 | 0.00183 | Proteobacteria | Alphaproteobacteria   | Rhodobacterales   | Rhodobacteraceae     | <i>Pseudoruegeria</i>   | nd                     | - |
| OTU_292 | 0.00000 | 0.00000 | 0.00180 | 0.00000 | 0.00180 | Proteobacteria | Alphaproteobacteria   | nd                | nd                   | nd                      | nd                     | + |
| OTU_297 | 0.00000 | 0.00000 | 0.00180 | 0.00000 | 0.00180 | Actinobacteria | Acidimicrobiia        | Acidimicrobiales  | Ilumatobacteraceae   | <i>Ilumatobacter</i>    | <i>I. nonamiensis</i>  | - |
| OTU_188 | 0.00177 | 0.00000 | 0.00000 | 0.00000 | 0.00177 | Tenericutes    | Mollicutes            | Mycoplasmatales   | Mycoplasmataceae     | <i>Mycoplasma</i>       | <i>M. marinum</i>      | - |
| OTU_189 | 0.00177 | 0.00000 | 0.00000 | 0.00000 | 0.00177 | Tenericutes    | Mollicutes            | Mycoplasmatales   | Mycoplasmataceae     | <i>Mycoplasma</i>       | <i>M. marinum</i>      | - |

|         |         |         |         |         |         |                |                       |                   |                    |                        |                        |   |
|---------|---------|---------|---------|---------|---------|----------------|-----------------------|-------------------|--------------------|------------------------|------------------------|---|
| OTU_261 | 0.00000 | 0.00000 | 0.00177 | 0.00000 | 0.00177 | Proteobacteria | Alphaproteobacteria   | Rhodobacterales   | Rhodobacteraceae   | <i>Sulfitobacter</i>   | nd                     | - |
| OTU_190 | 0.00176 | 0.00000 | 0.00000 | 0.00000 | 0.00176 | Tenericutes    | Mollicutes            | Mycoplasmatales   | Mycoplasmataceae   | <i>Mycoplasma</i>      | <i>M. marinum</i>      | - |
| OTU_138 | 0.00175 | 0.00000 | 0.00000 | 0.00000 | 0.00175 | Proteobacteria | Alphaproteobacteria   | Sphingomonadales  | Sphingomonadaceae  | <i>Zymomonas</i>       | nd                     | - |
| OTU_192 | 0.00174 | 0.00000 | 0.00000 | 0.00000 | 0.00174 | Tenericutes    | Mollicutes            | Mycoplasmatales   | Mycoplasmataceae   | <i>Mycoplasma</i>      | <i>M. marinum</i>      | - |
| OTU_195 | 0.00173 | 0.00000 | 0.00000 | 0.00000 | 0.00173 | Tenericutes    | Mollicutes            | Mycoplasmatales   | Mycoplasmataceae   | <i>Mycoplasma</i>      | <i>M. marinum</i>      | - |
| OTU_194 | 0.00173 | 0.00000 | 0.00000 | 0.00000 | 0.00173 | Tenericutes    | Mollicutes            | Mycoplasmatales   | Mycoplasmataceae   | <i>Mycoplasma</i>      | <i>M. marinum</i>      | - |
| OTU_199 | 0.00171 | 0.00000 | 0.00000 | 0.00000 | 0.00171 | Tenericutes    | Mollicutes            | Mycoplasmatales   | Mycoplasmataceae   | <i>Mycoplasma</i>      | <i>M. marinum</i>      | - |
| OTU_280 | 0.00000 | 0.00168 | 0.00000 | 0.00000 | 0.00168 | Tenericutes    | Mollicutes            | Mycoplasmatales   | Mycoplasmataceae   | <i>Mycoplasma</i>      | <i>M. marinum</i>      | - |
| OTU_202 | 0.00163 | 0.00000 | 0.00000 | 0.00000 | 0.00163 | Tenericutes    | Mollicutes            | Mycoplasmatales   | Mycoplasmataceae   | <i>Mycoplasma</i>      | <i>M. marinum</i>      | - |
| OTU_244 | 0.00000 | 0.00000 | 0.00000 | 0.00163 | 0.00163 | Tenericutes    | Mollicutes            | Mycoplasmatales   | Mycoplasmataceae   | <i>Mycoplasma</i>      | <i>M. marinum</i>      | - |
| OTU_204 | 0.00162 | 0.00000 | 0.00000 | 0.00000 | 0.00162 | Tenericutes    | Mollicutes            | Mycoplasmatales   | Mycoplasmataceae   | <i>Mycoplasma</i>      | <i>M. marinum</i>      | - |
| OTU_206 | 0.00161 | 0.00000 | 0.00000 | 0.00000 | 0.00161 | Tenericutes    | Mollicutes            | Mycoplasmatales   | Mycoplasmataceae   | <i>Mycoplasma</i>      | <i>M. marinum</i>      | - |
| OTU_209 | 0.00159 | 0.00000 | 0.00000 | 0.00000 | 0.00159 | Tenericutes    | Mollicutes            | Mycoplasmatales   | Mycoplasmataceae   | <i>Mycoplasma</i>      | <i>M. marinum</i>      | - |
| OTU_285 | 0.00000 | 0.00159 | 0.00000 | 0.00000 | 0.00159 | Tenericutes    | Mollicutes            | Mycoplasmatales   | Mycoplasmataceae   | <i>Mycoplasma</i>      | <i>M. marinum</i>      | - |
| OTU_274 | 0.00000 | 0.00000 | 0.00157 | 0.00000 | 0.00157 | Bacteroidetes  | Flavobacteriia        | Flavobacteriales  | Flavobacteriaceae  | <i>Marinirhabdus</i>   | <i>M. citrea</i>       | - |
| OTU_214 | 0.00155 | 0.00000 | 0.00000 | 0.00000 | 0.00155 | Tenericutes    | Mollicutes            | Mycoplasmatales   | Mycoplasmataceae   | <i>Mycoplasma</i>      | <i>M. marinum</i>      | - |
| OTU_215 | 0.00155 | 0.00000 | 0.00000 | 0.00000 | 0.00155 | Tenericutes    | Mollicutes            | Mycoplasmatales   | Mycoplasmataceae   | <i>Mycoplasma</i>      | <i>M. marinum</i>      | - |
| OTU_127 | 0.00154 | 0.00000 | 0.00000 | 0.00000 | 0.00154 | Bacteroidetes  | Cytophagia            | Cytophagales      | Flammeovirgaceae   | <i>Sedimentomix</i>    | <i>S. flava</i>        | - |
| OTU_111 | 0.00000 | 0.00000 | 0.00000 | 0.00154 | 0.00154 | Proteobacteria | Epsilonproteobacteria | Campylobacterales | Campylobacteraceae | <i>Arcobacter</i>      | <i>A. nitrofigilis</i> | - |
| OTU_278 | 0.00000 | 0.00000 | 0.00154 | 0.00000 | 0.00154 | Bacteroidetes  | Flavobacteriia        | Flavobacteriales  | Flavobacteriaceae  | <i>Actibacter</i>      | nd                     | - |
| OTU_119 | 0.00000 | 0.00106 | 0.00000 | 0.00047 | 0.00153 | Firmicutes     | Clostridia            | Eubacteriales     | Lachnospiraceae    | <i>Natranaerovirga</i> | <i>N. pectinivora</i>  | + |
| OTU_149 | 0.00152 | 0.00000 | 0.00000 | 0.00000 | 0.00152 | Proteobacteria | Gammaproteobacteria   | nd                | nd                 | nd                     | nd                     | - |
| OTU_217 | 0.00151 | 0.00000 | 0.00000 | 0.00000 | 0.00151 | Tenericutes    | Mollicutes            | Mycoplasmatales   | Mycoplasmataceae   | <i>Mycoplasma</i>      | <i>M. marinum</i>      | - |
| OTU_219 | 0.00149 | 0.00000 | 0.00000 | 0.00000 | 0.00149 | Tenericutes    | Mollicutes            | Mycoplasmatales   | Mycoplasmataceae   | <i>Mycoplasma</i>      | <i>M. marinum</i>      | - |
| OTU_218 | 0.00149 | 0.00000 | 0.00000 | 0.00000 | 0.00149 | Tenericutes    | Mollicutes            | Mycoplasmatales   | Mycoplasmataceae   | <i>Mycoplasma</i>      | <i>M. marinum</i>      | - |
| OTU_220 | 0.00148 | 0.00000 | 0.00000 | 0.00000 | 0.00148 | Tenericutes    | Mollicutes            | Mycoplasmatales   | Mycoplasmataceae   | <i>Mycoplasma</i>      | <i>M. marinum</i>      | - |
| OTU_314 | 0.00000 | 0.00000 | 0.00147 | 0.00000 | 0.00147 | Actinobacteria | Acidimicrobiia        | Acidimicrobiales  | Ilumatobacteraceae | <i>Ilumatobacter</i>   | <i>I. nonamiensis</i>  | + |
| OTU_226 | 0.00144 | 0.00000 | 0.00000 | 0.00000 | 0.00144 | Tenericutes    | Mollicutes            | Mycoplasmatales   | Mycoplasmataceae   | <i>Mycoplasma</i>      | <i>M. marinum</i>      | - |
| OTU_225 | 0.00144 | 0.00000 | 0.00000 | 0.00000 | 0.00144 | Tenericutes    | Mollicutes            | Mycoplasmatales   | Mycoplasmataceae   | <i>Mycoplasma</i>      | <i>M. marinum</i>      | - |
| OTU_288 | 0.00000 | 0.00000 | 0.00144 | 0.00000 | 0.00144 | Proteobacteria | Alphaproteobacteria   | Rhodobacterales   | Rhodobacteraceae   | nd                     | nd                     | - |
| OTU_283 | 0.00000 | 0.00000 | 0.00144 | 0.00000 | 0.00144 | Bacteroidetes  | Flavobacteriia        | Flavobacteriales  | Flavobacteriaceae  | <i>Taeania</i>         | <i>T. maliponensis</i> | - |
| OTU_289 | 0.00000 | 0.00000 | 0.00144 | 0.00000 | 0.00144 | Proteobacteria | Alphaproteobacteria   | Rhodobacterales   | Rhodobacteraceae   | <i>Pseudoruegeria</i>  | <i>P. insulae</i>      | - |
| OTU_228 | 0.00141 | 0.00000 | 0.00000 | 0.00000 | 0.00141 | Tenericutes    | Mollicutes            | Mycoplasmatales   | Mycoplasmataceae   | <i>Mycoplasma</i>      | <i>M. marinum</i>      | - |

|         |         |         |         |         |         |                |                       |                    |                    |                               |                      |   |
|---------|---------|---------|---------|---------|---------|----------------|-----------------------|--------------------|--------------------|-------------------------------|----------------------|---|
| OTU_152 | 0.00140 | 0.00000 | 0.00000 | 0.00000 | 0.00140 | Proteobacteria | Gammaproteobacteria   | Enterobacteriales  | Yersiniaceae       | <i>Serratia</i>               | nd                   | - |
| OTU_230 | 0.00140 | 0.00000 | 0.00000 | 0.00000 | 0.00140 | Tenericutes    | Mollicutes            | Mycoplasmatales    | Mycoplasmataceae   | <i>Mycoplasma</i>             | <i>M. marinum</i>    | - |
| OTU_233 | 0.00139 | 0.00000 | 0.00000 | 0.00000 | 0.00139 | Tenericutes    | Mollicutes            | Mycoplasmatales    | Mycoplasmataceae   | <i>Mycoplasma</i>             | <i>M. marinum</i>    | - |
| OTU_235 | 0.00139 | 0.00000 | 0.00000 | 0.00000 | 0.00139 | Tenericutes    | Mollicutes            | Mycoplasmatales    | Mycoplasmataceae   | <i>Mycoplasma</i>             | <i>M. marinum</i>    | - |
| OTU_264 | 0.00000 | 0.00000 | 0.00137 | 0.00000 | 0.00137 | Proteobacteria | Deltaproteobacteria   | Desulfobacteriales | Desulfobacteraceae | <i>Desulfococcus</i>          | nd                   | - |
| OTU_237 | 0.00137 | 0.00000 | 0.00000 | 0.00000 | 0.00137 | Tenericutes    | Mollicutes            | Mycoplasmatales    | Mycoplasmataceae   | <i>Mycoplasma</i>             | <i>M. marinum</i>    | - |
| OTU_64  | 0.00137 | 0.00000 | 0.00000 | 0.00000 | 0.00137 | Proteobacteria | Gammaproteobacteria   | Vibrionales        | Vibrionaceae       | nd                            | nd                   | - |
| OTU_238 | 0.00135 | 0.00000 | 0.00000 | 0.00000 | 0.00135 | Tenericutes    | Mollicutes            | Mycoplasmatales    | Mycoplasmataceae   | <i>Mycoplasma</i>             | <i>M. marinum</i>    | - |
| OTU_239 | 0.00135 | 0.00000 | 0.00000 | 0.00000 | 0.00135 | Tenericutes    | Mollicutes            | Mycoplasmatales    | Mycoplasmataceae   | <i>Mycoplasma</i>             | <i>M. marinum</i>    | - |
| OTU_240 | 0.00134 | 0.00000 | 0.00000 | 0.00000 | 0.00134 | Tenericutes    | Mollicutes            | Mycoplasmatales    | Mycoplasmataceae   | <i>Mycoplasma</i>             | <i>M. marinum</i>    | - |
| OTU_293 | 0.00000 | 0.00000 | 0.00131 | 0.00000 | 0.00131 | Proteobacteria | Alphaproteobacteria   | Rhodospirillales   | Geminococcaceae    | <i>CandidatusCombothrix</i>   | <i>italica</i>       | - |
| OTU_304 | 0.00000 | 0.00131 | 0.00000 | 0.00000 | 0.00131 | Tenericutes    | Mollicutes            | Mycoplasmatales    | Mycoplasmataceae   | <i>Mycoplasma</i>             | <i>M. marinum</i>    | - |
| OTU_247 | 0.00130 | 0.00000 | 0.00000 | 0.00000 | 0.00130 | Tenericutes    | Mollicutes            | Mycoplasmatales    | Mycoplasmataceae   | <i>Mycoplasma</i>             | <i>M. marinum</i>    | - |
| OTU_246 | 0.00130 | 0.00000 | 0.00000 | 0.00000 | 0.00130 | Tenericutes    | Mollicutes            | Mycoplasmatales    | Mycoplasmataceae   | <i>Mycoplasma</i>             | <i>M. marinum</i>    | - |
| OTU_245 | 0.00130 | 0.00000 | 0.00000 | 0.00000 | 0.00130 | Tenericutes    | Mollicutes            | Mycoplasmatales    | Mycoplasmataceae   | <i>Mycoplasma</i>             | <i>M. marinum</i>    | - |
| OTU_141 | 0.00000 | 0.00129 | 0.00000 | 0.00000 | 0.00129 | Firmicutes     | Clostridia            | Clostridiales      | nd                 | <i>Acidaminobacter</i>        | nd                   | - |
| OTU_306 | 0.00000 | 0.00129 | 0.00000 | 0.00000 | 0.00129 | Tenericutes    | Mollicutes            | Mycoplasmatales    | Mycoplasmataceae   | <i>Mycoplasma</i>             | <i>M. marinum</i>    | - |
| OTU_307 | 0.00000 | 0.00128 | 0.00000 | 0.00000 | 0.00128 | Tenericutes    | Mollicutes            | Mycoplasmatales    | Mycoplasmataceae   | <i>Mycoplasma</i>             | <i>M. marinum</i>    | - |
| OTU_308 | 0.00000 | 0.00128 | 0.00000 | 0.00000 | 0.00128 | Tenericutes    | Mollicutes            | Mycoplasmatales    | Mycoplasmataceae   | <i>Mycoplasma</i>             | <i>M. marinum</i>    | - |
| OTU_251 | 0.00127 | 0.00000 | 0.00000 | 0.00000 | 0.00127 | Tenericutes    | Mollicutes            | Mycoplasmatales    | Mycoplasmataceae   | <i>Mycoplasma</i>             | <i>M. marinum</i>    | - |
| OTU_249 | 0.00127 | 0.00000 | 0.00000 | 0.00000 | 0.00127 | Tenericutes    | Mollicutes            | Mycoplasmatales    | Mycoplasmataceae   | <i>Mycoplasma</i>             | <i>M. marinum</i>    | - |
| OTU_252 | 0.00126 | 0.00000 | 0.00000 | 0.00000 | 0.00126 | Tenericutes    | Mollicutes            | Mycoplasmatales    | Mycoplasmataceae   | <i>Mycoplasma</i>             | <i>M. marinum</i>    | - |
| OTU_137 | 0.00000 | 0.00126 | 0.00000 | 0.00000 | 0.00126 | Proteobacteria | Epsilonproteobacteria | Campylobacteriales | Campylobacteraceae | <i>Arcobacter</i>             | nd                   | - |
| OTU_166 | 0.00000 | 0.00126 | 0.00000 | 0.00000 | 0.00126 | Proteobacteria | Deltaproteobacteria   | Desulfobacteriales | Desulfobulbaceae   | <i>CandidatusElectrothrix</i> | <i>C.E. japonica</i> | - |
| OTU_255 | 0.00123 | 0.00000 | 0.00000 | 0.00000 | 0.00123 | Tenericutes    | Mollicutes            | Mycoplasmatales    | Mycoplasmataceae   | <i>Mycoplasma</i>             | <i>M. marinum</i>    | - |
| OTU_309 | 0.00000 | 0.00123 | 0.00000 | 0.00000 | 0.00123 | Tenericutes    | Mollicutes            | Mycoplasmatales    | Mycoplasmataceae   | <i>Mycoplasma</i>             | <i>M. marinum</i>    | - |
| OTU_174 | 0.00000 | 0.00123 | 0.00000 | 0.00000 | 0.00123 | Proteobacteria | Deltaproteobacteria   | Desulfobacteriales | Desulfobulbaceae   | <i>CandidatusElectrothrix</i> | <i>C.E. japonica</i> | - |
| OTU_257 | 0.00122 | 0.00000 | 0.00000 | 0.00000 | 0.00122 | Tenericutes    | Mollicutes            | Mycoplasmatales    | Mycoplasmataceae   | <i>Mycoplasma</i>             | <i>M. marinum</i>    | - |
| OTU_201 | 0.00000 | 0.00000 | 0.00000 | 0.00122 | 0.00122 | Proteobacteria | Gammaproteobacteria   | Cellvibrionales    | Haliaceae          | <i>Haliera</i>                | <i>H. sp.ETY-M</i>   | - |
| OTU_260 | 0.00121 | 0.00000 | 0.00000 | 0.00000 | 0.00121 | Tenericutes    | Mollicutes            | Mycoplasmatales    | Mycoplasmataceae   | <i>Mycoplasma</i>             | <i>M. marinum</i>    | - |
| OTU_259 | 0.00121 | 0.00000 | 0.00000 | 0.00000 | 0.00121 | Tenericutes    | Mollicutes            | Mycoplasmatales    | Mycoplasmataceae   | <i>Mycoplasma</i>             | <i>M. marinum</i>    | - |
| OTU_258 | 0.00121 | 0.00000 | 0.00000 | 0.00000 | 0.00121 | Tenericutes    | Mollicutes            | Mycoplasmatales    | Mycoplasmataceae   | <i>Mycoplasma</i>             | <i>M. marinum</i>    | - |
| OTU_311 | 0.00000 | 0.00121 | 0.00000 | 0.00000 | 0.00121 | Tenericutes    | Mollicutes            | Mycoplasmatales    | Mycoplasmataceae   | <i>Mycoplasma</i>             | <i>M. marinum</i>    | - |

|         |         |         |         |         |         |                |                       |                    |                     |                             |                        |   |
|---------|---------|---------|---------|---------|---------|----------------|-----------------------|--------------------|---------------------|-----------------------------|------------------------|---|
| OTU_121 | 0.00000 | 0.00121 | 0.00000 | 0.00000 | 0.00121 | Proteobacteria | Gammaproteobacteria   | Vibrionales        | Vibrionaceae        | <i>Vibrio</i>               | <i>V. sp.r32</i>       | - |
| OTU_263 | 0.00120 | 0.00000 | 0.00000 | 0.00000 | 0.00120 | Tenericutes    | Mollicutes            | Mycoplasmatales    | Mycoplasmataceae    | <i>Mycoplasma</i>           | <i>M. marinum</i>      | - |
| OTU_262 | 0.00120 | 0.00000 | 0.00000 | 0.00000 | 0.00120 | Tenericutes    | Mollicutes            | Mycoplasmatales    | Mycoplasmataceae    | <i>Mycoplasma</i>           | <i>M. marinum</i>      | - |
| OTU_146 | 0.00119 | 0.00000 | 0.00000 | 0.00000 | 0.00119 | Bacteroidetes  | Flavobacteriia        | Flavobacteriales   | Flavobacteriaceae   | <i>Lutibacter</i>           | <i>L. holmesii</i>     | - |
| OTU_175 | 0.00000 | 0.00118 | 0.00000 | 0.00000 | 0.00118 | Proteobacteria | Deltaproteobacteria   | Desulfovibrionales | Desulfovibrionaceae | <i>Desulfovibrio</i>        | nd                     | - |
| OTU_284 | 0.00000 | 0.00000 | 0.00118 | 0.00000 | 0.00118 | Proteobacteria | Deltaproteobacteria   | Desulfobacterales  | Desulfobacteraceae  | <i>Desulfococcus</i>        | nd                     | - |
| OTU_177 | 0.00117 | 0.00000 | 0.00000 | 0.00000 | 0.00117 | Bacteroidetes  | Flavobacteriia        | Flavobacteriales   | Flavobacteriaceae   | <i>Polaribacter</i>         | nd                     | - |
| OTU_312 | 0.00000 | 0.00117 | 0.00000 | 0.00000 | 0.00117 | Tenericutes    | Mollicutes            | Mycoplasmatales    | Mycoplasmataceae    | <i>Mycoplasma</i>           | <i>M. marinum</i>      | - |
| OTU_265 | 0.00116 | 0.00000 | 0.00000 | 0.00000 | 0.00116 | Tenericutes    | Mollicutes            | Mycoplasmatales    | Mycoplasmataceae    | <i>Mycoplasma</i>           | <i>M. marinum</i>      | - |
| OTU_302 | 0.00000 | 0.00000 | 0.00114 | 0.00000 | 0.00114 | Proteobacteria | Alphaproteobacteria   | Rhodospirillales   | Geminococcaceae     | <i>CandidatusCombothrix</i> | <i>C.C. italica</i>    | - |
| OTU_315 | 0.00000 | 0.00114 | 0.00000 | 0.00000 | 0.00114 | Tenericutes    | Mollicutes            | Mycoplasmatales    | Mycoplasmataceae    | <i>Mycoplasma</i>           | <i>M. marinum</i>      | - |
| OTU_159 | 0.00113 | 0.00000 | 0.00000 | 0.00000 | 0.00113 | nd             | nd                    | nd                 | nd                  | nd                          | nd                     | - |
| OTU_210 | 0.00000 | 0.00000 | 0.00000 | 0.00112 | 0.00112 | Proteobacteria | Alphaproteobacteria   | Sphingomonadales   | Sphingomonadaceae   | <i>Zymomonas</i>            | nd                     | - |
| OTU_337 | 0.00000 | 0.00000 | 0.00111 | 0.00000 | 0.00111 | Actinobacteria | Acidimicrobiia        | Acidimicrobiales   | Ilumatobacteraceae  | <i>Ilumatobacter</i>        | <i>I. nonamiensis</i>  | + |
| OTU_270 | 0.00111 | 0.00000 | 0.00000 | 0.00000 | 0.00111 | Tenericutes    | Mollicutes            | Mycoplasmatales    | Mycoplasmataceae    | <i>Mycoplasma</i>           | <i>M. marinum</i>      | - |
| OTU_269 | 0.00111 | 0.00000 | 0.00000 | 0.00000 | 0.00111 | Tenericutes    | Mollicutes            | Mycoplasmatales    | Mycoplasmataceae    | <i>Mycoplasma</i>           | <i>M. marinum</i>      | - |
| OTU_316 | 0.00000 | 0.00111 | 0.00000 | 0.00000 | 0.00111 | Tenericutes    | Mollicutes            | Mycoplasmatales    | Mycoplasmataceae    | <i>Mycoplasma</i>           | <i>M. marinum</i>      | - |
| OTU_317 | 0.00000 | 0.00111 | 0.00000 | 0.00000 | 0.00111 | Tenericutes    | Mollicutes            | Mycoplasmatales    | Mycoplasmataceae    | <i>Mycoplasma</i>           | <i>M. marinum</i>      | - |
| OTU_318 | 0.00000 | 0.00109 | 0.00000 | 0.00000 | 0.00109 | Tenericutes    | Mollicutes            | Mycoplasmatales    | Mycoplasmataceae    | <i>Mycoplasma</i>           | <i>M. marinum</i>      | - |
| OTU_320 | 0.00000 | 0.00107 | 0.00000 | 0.00000 | 0.00107 | Tenericutes    | Mollicutes            | Mycoplasmatales    | Mycoplasmataceae    | <i>Mycoplasma</i>           | <i>M. marinum</i>      | - |
| OTU_90  | 0.00107 | 0.00000 | 0.00000 | 0.00000 | 0.00107 | Proteobacteria | Gammaproteobacteria   | Vibrionales        | Vibrionaceae        | <i>Vibrio</i>               | nd                     | - |
| OTU_277 | 0.00107 | 0.00000 | 0.00000 | 0.00000 | 0.00107 | Tenericutes    | Mollicutes            | Mycoplasmatales    | Mycoplasmataceae    | <i>Mycoplasma</i>           | <i>M. marinum</i>      | - |
| OTU_144 | 0.00000 | 0.00000 | 0.00000 | 0.00106 | 0.00106 | Proteobacteria | Epsilonproteobacteria | Campylobacterales  | Campylobacteraceae  | <i>Arcobacter</i>           | <i>A. nitrofigilis</i> | - |
| OTU_321 | 0.00000 | 0.00106 | 0.00000 | 0.00000 | 0.00106 | Tenericutes    | Mollicutes            | Mycoplasmatales    | Mycoplasmataceae    | <i>Mycoplasma</i>           | <i>M. marinum</i>      | - |
| OTU_281 | 0.00105 | 0.00000 | 0.00000 | 0.00000 | 0.00105 | Tenericutes    | Mollicutes            | Mycoplasmatales    | Mycoplasmataceae    | <i>Mycoplasma</i>           | <i>M. marinum</i>      | - |
| OTU_323 | 0.00000 | 0.00104 | 0.00000 | 0.00000 | 0.00104 | Tenericutes    | Mollicutes            | Mycoplasmatales    | Mycoplasmataceae    | <i>Mycoplasma</i>           | <i>M. marinum</i>      | - |
| OTU_324 | 0.00000 | 0.00104 | 0.00000 | 0.00000 | 0.00104 | Tenericutes    | Mollicutes            | Mycoplasmatales    | Mycoplasmataceae    | <i>Mycoplasma</i>           | <i>M. marinum</i>      | - |
| OTU_150 | 0.00000 | 0.00103 | 0.00000 | 0.00000 | 0.00103 | Proteobacteria | Epsilonproteobacteria | Campylobacterales  | Campylobacteraceae  | <i>Arcobacter</i>           | nd                     | - |
| OTU_181 | 0.00000 | 0.00000 | 0.00000 | 0.00100 | 0.00100 | Bacteroidetes  | Flavobacteriia        | Flavobacteriales   | Flavobacteriaceae   | nd                          | nd                     | - |
| OTU_326 | 0.00000 | 0.00098 | 0.00000 | 0.00000 | 0.00098 | Tenericutes    | Mollicutes            | Mycoplasmatales    | Mycoplasmataceae    | <i>Mycoplasma</i>           | <i>M. marinum</i>      | - |
| OTU_291 | 0.00098 | 0.00000 | 0.00000 | 0.00000 | 0.00098 | Tenericutes    | Mollicutes            | Mycoplasmatales    | Mycoplasmataceae    | <i>Mycoplasma</i>           | <i>M. marinum</i>      | - |
| OTU_327 | 0.00000 | 0.00097 | 0.00000 | 0.00000 | 0.00097 | Tenericutes    | Mollicutes            | Mycoplasmatales    | Mycoplasmataceae    | <i>Mycoplasma</i>           | <i>M. marinum</i>      | - |
| OTU_328 | 0.00000 | 0.00095 | 0.00000 | 0.00000 | 0.00095 | Tenericutes    | Mollicutes            | Mycoplasmatales    | Mycoplasmataceae    | <i>Mycoplasma</i>           | <i>M. marinum</i>      | - |

|         |         |         |         |         |         |                |                       |                    |                       |                               |                         |   |
|---------|---------|---------|---------|---------|---------|----------------|-----------------------|--------------------|-----------------------|-------------------------------|-------------------------|---|
| OTU_329 | 0.00000 | 0.00095 | 0.00000 | 0.00000 | 0.00095 | Tenericutes    | Mollicutes            | Mycoplasmatales    | Mycoplasmataceae      | <i>Mycoplasma</i>             | <i>M. marinum</i>       | - |
| OTU_153 | 0.00095 | 0.00000 | 0.00000 | 0.00000 | 0.00095 | Fibrobacteres  | Chitinivibrionia      | Chitinivibrionales | Chitinivibrionaceae   | <i>Chitinivibrio</i>          | <i>C. alkaliphilus</i>  | - |
| OTU_331 | 0.00000 | 0.00093 | 0.00000 | 0.00000 | 0.00093 | Tenericutes    | Mollicutes            | Mycoplasmatales    | Mycoplasmataceae      | <i>Mycoplasma</i>             | <i>M. marinum</i>       | - |
| OTU_334 | 0.00000 | 0.00093 | 0.00000 | 0.00000 | 0.00093 | Tenericutes    | Mollicutes            | Mycoplasmatales    | Mycoplasmataceae      | <i>Mycoplasma</i>             | <i>M. marinum</i>       | - |
| OTU_332 | 0.00000 | 0.00093 | 0.00000 | 0.00000 | 0.00093 | Tenericutes    | Mollicutes            | Mycoplasmatales    | Mycoplasmataceae      | <i>Mycoplasma</i>             | <i>M. marinum</i>       | - |
| OTU_330 | 0.00000 | 0.00093 | 0.00000 | 0.00000 | 0.00093 | Tenericutes    | Mollicutes            | Mycoplasmatales    | Mycoplasmataceae      | <i>Mycoplasma</i>             | <i>M. marinum</i>       | - |
| OTU_158 | 0.00093 | 0.00000 | 0.00000 | 0.00000 | 0.00093 | Bacteroidetes  | Bacteroidia           | Marinilabiales     | Prolixibacteraceae    | <i>Prolixibacter</i>          | nd                      | - |
| OTU_300 | 0.00088 | 0.00000 | 0.00000 | 0.00000 | 0.00088 | Tenericutes    | Mollicutes            | Mycoplasmatales    | Mycoplasmataceae      | <i>Mycoplasma</i>             | <i>M. marinum</i>       | - |
| OTU_301 | 0.00087 | 0.00000 | 0.00000 | 0.00000 | 0.00087 | Tenericutes    | Mollicutes            | Mycoplasmatales    | Mycoplasmataceae      | <i>Mycoplasma</i>             | <i>M. marinum</i>       | - |
| OTU_110 | 0.00087 | 0.00000 | 0.00000 | 0.00000 | 0.00087 | Proteobacteria | Gammaproteobacteria   | Vibrionales        | Vibrionaceae          | <i>Vibrio</i>                 | nd                      | - |
| OTU_112 | 0.00086 | 0.00000 | 0.00000 | 0.00000 | 0.00086 | Proteobacteria | Gammaproteobacteria   | Vibrionales        | Vibrionaceae          | <i>Vibrio</i>                 | nd                      | - |
| OTU_335 | 0.00000 | 0.00000 | 0.00085 | 0.00000 | 0.00085 | Proteobacteria | Alphaproteobacteria   | Rhodobacterales    | Rhodobacteraceae      | <i>Oceanicella</i>            | <i>O. actignis</i>      | - |
| OTU_207 | 0.00000 | 0.00084 | 0.00000 | 0.00000 | 0.00084 | Firmicutes     | Bacilli               | Lactobacillales    | Leuconostocaceae      | <i>Leuconostoc</i>            | nd                      | + |
| OTU_115 | 0.00083 | 0.00000 | 0.00000 | 0.00000 | 0.00083 | Proteobacteria | Gammaproteobacteria   | Vibrionales        | Vibrionaceae          | <i>Vibrio</i>                 | nd                      | - |
| OTU_179 | 0.00082 | 0.00000 | 0.00000 | 0.00000 | 0.00082 | Bacteroidetes  | Flavobacteriia        | Flavobacteriales   | Flavobacteriaceae     | nd                            | nd                      | - |
| OTU_319 | 0.00000 | 0.00000 | 0.00082 | 0.00000 | 0.00082 | Proteobacteria | Deltaproteobacteria   | Desulfobacterales  | Desulfobacteraceae    | nd                            | nd                      | - |
| OTU_117 | 0.00080 | 0.00000 | 0.00000 | 0.00000 | 0.00080 | Proteobacteria | Gammaproteobacteria   | Vibrionales        | Vibrionaceae          | <i>Vibrio</i>                 | <i>V. sp.S2895</i>      | - |
| OTU_187 | 0.00078 | 0.00000 | 0.00000 | 0.00000 | 0.00078 | Bacteroidetes  | Flavobacteriia        | Flavobacteriales   | Flavobacteriaceae     | <i>Formosa</i>                | <i>F. sp.Hel3_AI_48</i> | - |
| OTU_124 | 0.00073 | 0.00000 | 0.00000 | 0.00000 | 0.00073 | Proteobacteria | Gammaproteobacteria   | Vibrionales        | Vibrionaceae          | <i>Vibrio</i>                 | nd                      | - |
| OTU_322 | 0.00000 | 0.00000 | 0.00072 | 0.00000 | 0.00072 | Firmicutes     | Bacilli               | Lactobacillales    | Leuconostocaceae      | <i>Leuconostoc</i>            | nd                      | + |
| OTU_273 | 0.00000 | 0.00072 | 0.00000 | 0.00000 | 0.00072 | Bacteroidetes  | Bacteroidia           | Marinilabiales     | Prolixibacteraceae    | <i>Prolixibacter</i>          | nd                      | - |
| OTU_96  | 0.00071 | 0.00000 | 0.00000 | 0.00000 | 0.00071 | Firmicutes     | Bacilli               | Bacillales         | Bacillaceae           | <i>Bacillus</i>               | <i>B. sp.R48_27f</i>    | + |
| OTU_333 | 0.00000 | 0.00000 | 0.00069 | 0.00000 | 0.00069 | Proteobacteria | Deltaproteobacteria   | Desulfobacterales  | Desulfobacteraceae    | <i>CandidatusMagnetomorum</i> | <i>C.M. sp.1-7</i>      | - |
| OTU_336 | 0.00000 | 0.00000 | 0.00065 | 0.00000 | 0.00065 | Proteobacteria | Deltaproteobacteria   | Desulfobacterales  | Desulfobacteraceae    | <i>CandidatusMagnetomorum</i> | <i>C.M. sp.1-7</i>      | - |
| OTU_212 | 0.00000 | 0.00064 | 0.00000 | 0.00000 | 0.00064 | Proteobacteria | Epsilonproteobacteria | Campylobacterales  | Campylobacteraceae    | <i>Arcobacter</i>             | nd                      | - |
| OTU_242 | 0.00000 | 0.00062 | 0.00000 | 0.00000 | 0.00062 | Proteobacteria | Gammaproteobacteria   | Oceanospirillales  | Endozoicomonadaceae   | <i>Kistimonas</i>             | nd                      | - |
| OTU_145 | 0.00059 | 0.00000 | 0.00000 | 0.00000 | 0.00059 | Proteobacteria | Gammaproteobacteria   | Vibrionales        | Vibrionaceae          | <i>Vibrio</i>                 | nd                      | - |
| OTU_196 | 0.00000 | 0.00059 | 0.00000 | 0.00000 | 0.00059 | Proteobacteria | Gammaproteobacteria   | Vibrionales        | Vibrionaceae          | <i>Vibrio</i>                 | nd                      | - |
| OTU_161 | 0.00000 | 0.00058 | 0.00000 | 0.00000 | 0.00058 | Firmicutes     | Clostridia            | Clostridiales      | Peptostreptococcaceae | <i>Paeniclostridium</i>       | <i>P. ghonii</i>        | + |
| OTU_151 | 0.00053 | 0.00000 | 0.00000 | 0.00000 | 0.00053 | Proteobacteria | Gammaproteobacteria   | Vibrionales        | Vibrionaceae          | <i>Vibrio</i>                 | nd                      | - |
| OTU_154 | 0.00000 | 0.00048 | 0.00000 | 0.00000 | 0.00048 | Proteobacteria | Gammaproteobacteria   | Alteromonadales    | Shewanellaceae        | <i>Shewanella</i>             | nd                      | - |
| OTU_191 | 0.00000 | 0.00000 | 0.00000 | 0.00047 | 0.00047 | Proteobacteria | Gammaproteobacteria   | Vibrionales        | Vibrionaceae          | <i>Vibrio</i>                 | nd                      | - |
| OTU_234 | 0.00000 | 0.00047 | 0.00000 | 0.00000 | 0.00047 | Proteobacteria | Gammaproteobacteria   | Vibrionales        | Vibrionaceae          | <i>Vibrio</i>                 | <i>V. scopthalmi</i>    | - |

|         |         |         |         |         |         |                |                       |                   |                    |                      |                        |   |
|---------|---------|---------|---------|---------|---------|----------------|-----------------------|-------------------|--------------------|----------------------|------------------------|---|
| OTU_287 | 0.00000 | 0.00040 | 0.00000 | 0.00000 | 0.00040 | Proteobacteria | Epsilonproteobacteria | Campylobacterales | Campylobacteraceae | <i>Arcobacter</i>    | nd                     | - |
| OTU_184 | 0.00039 | 0.00000 | 0.00000 | 0.00000 | 0.00039 | Proteobacteria | Gammaproteobacteria   | Vibrionales       | Vibrionaceae       | <i>Vibrio</i>        | nd                     | - |
| OTU_248 | 0.00000 | 0.00000 | 0.00000 | 0.00039 | 0.00039 | Proteobacteria | Gammaproteobacteria   | Oceanospirillales | Hahellaceae        | <i>Zooshikella</i>   | nd                     | - |
| OTU_267 | 0.00000 | 0.00039 | 0.00000 | 0.00000 | 0.00039 | Proteobacteria | Gammaproteobacteria   | Vibrionales       | Vibrionaceae       | <i>Vibrio</i>        | nd                     | - |
| OTU_268 | 0.00000 | 0.00039 | 0.00000 | 0.00000 | 0.00039 | Proteobacteria | Gammaproteobacteria   | Vibrionales       | Vibrionaceae       | <i>Vibrio</i>        | nd                     | - |
| OTU_266 | 0.00000 | 0.00039 | 0.00000 | 0.00000 | 0.00039 | Proteobacteria | Gammaproteobacteria   | Vibrionales       | Vibrionaceae       | <i>Vibrio</i>        | nd                     | - |
| OTU_286 | 0.00000 | 0.00000 | 0.00000 | 0.00038 | 0.00038 | Proteobacteria | Epsilonproteobacteria | Campylobacterales | Campylobacteraceae | <i>Arcobacter</i>    | <i>A. nitrofigilis</i> | - |
| OTU_197 | 0.00037 | 0.00000 | 0.00000 | 0.00000 | 0.00037 | Proteobacteria | Gammaproteobacteria   | Vibrionales       | Vibrionaceae       | <i>Vibrio</i>        | nd                     | - |
| OTU_208 | 0.00035 | 0.00000 | 0.00000 | 0.00000 | 0.00035 | Proteobacteria | Gammaproteobacteria   | Vibrionales       | Vibrionaceae       | <i>Vibrio</i>        | nd                     | - |
| OTU_180 | 0.00025 | 0.00000 | 0.00000 | 0.00000 | 0.00025 | Proteobacteria | Gammaproteobacteria   | Alteromonadales   | Shewanellaceae     | <i>Shewanella</i>    | <i>S. baltica</i>      | - |
| OTU_185 | 0.00025 | 0.00000 | 0.00000 | 0.00000 | 0.00025 | Proteobacteria | Gammaproteobacteria   | Alteromonadales   | Colwelliaceae      | <i>Thalassomonas</i> | nd                     | - |

**Table S5** – Relative abundance of 21 bacterial operational taxonomic units (OTUs) identified in the *Cerastoderma edule* gut that are shared by the four DNA extraction kits (E.Z.N.A., DNeasy, PowerFecal, and Zymo).

| #OTU ID | E.Z.N.A. | DNeasy  | PowerFecal | Zymo    | SUM     | % <sup>a</sup> | Phylum         | Class                 | Order             | Family                | Genus                 |
|---------|----------|---------|------------|---------|---------|----------------|----------------|-----------------------|-------------------|-----------------------|-----------------------|
| OTU_2   | 0.12893  | 0.10069 | 0.13987    | 0.16360 | 0.53309 | 13.33          | Tenericutes    | Mollicutes            | Mycoplasmatales   | Mycoplasmataceae      | <i>Mycoplasma</i>     |
| OTU_1   | 0.29687  | 0.06042 | 0.06400    | 0.03858 | 0.45987 | 11.50          | Tenericutes    | Mollicutes            | Mycoplasmatales   | Mycoplasmataceae      | <i>Mycoplasma</i>     |
| OTU_4   | 0.00316  | 0.19845 | 0.12507    | 0.07611 | 0.40278 | 10.07          | Tenericutes    | Mollicutes            | Mycoplasmatales   | Mycoplasmataceae      | <i>Mycoplasma</i>     |
| OTU_5   | 0.04512  | 0.05751 | 0.06976    | 0.13754 | 0.30992 | 7.75           | Tenericutes    | Mollicutes            | Mycoplasmatales   | Mycoplasmataceae      | <i>Mycoplasma</i>     |
| OTU_8   | 0.04500  | 0.02539 | 0.03203    | 0.04668 | 0.14910 | 3.73           | Tenericutes    | Mollicutes            | Mycoplasmatales   | Mycoplasmataceae      | <i>Mycoplasma</i>     |
| OTU_7   | 0.03904  | 0.03627 | 0.02036    | 0.05130 | 0.14697 | 3.67           | Tenericutes    | Mollicutes            | Mycoplasmatales   | Mycoplasmataceae      | <i>Mycoplasma</i>     |
| OTU_10  | 0.00721  | 0.03737 | 0.00631    | 0.09002 | 0.14090 | 3.52           | Proteobacteria | Alphaproteobacteria   | Rickettsiales     | Anaplasmataceae       | <i>Anaplasma</i>      |
| OTU_3   | 0.01773  | 0.02615 | 0.02664    | 0.03997 | 0.11049 | 2.76           | Proteobacteria | Epsilonproteobacteria | Campylobacterales | Campylobacteraceae    | <i>Arcobacter</i>     |
| OTU_12  | 0.00755  | 0.01975 | 0.02772    | 0.03397 | 0.08899 | 2.22           | Tenericutes    | Mollicutes            | Mycoplasmatales   | Mycoplasmataceae      | <i>Mycoplasma</i>     |
| OTU_6   | 0.05537  | 0.00805 | 0.00173    | 0.00095 | 0.06610 | 1.65           | Proteobacteria | Gammaproteobacteria   | Thiotrichales     | Fastidiosibacteraceae | <i>Cysteiniphilum</i> |
| OTU_14  | 0.01924  | 0.01527 | 0.00807    | 0.00952 | 0.05210 | 1.30           | Tenericutes    | Mollicutes            | Mycoplasmatales   | Mycoplasmataceae      | <i>Mycoplasma</i>     |
| OTU_19  | 0.00239  | 0.00870 | 0.00843    | 0.02345 | 0.04298 | 1.07           | Tenericutes    | Mollicutes            | Mycoplasmatales   | Mycoplasmataceae      | <i>Mycoplasma</i>     |
| OTU_16  | 0.00163  | 0.00282 | 0.01772    | 0.00420 | 0.02636 | 0.66           | Proteobacteria | Deltaproteobacteria   | Desulfobacterales | Desulfobulbaceae      | <i>Desulfopila</i>    |
| OTU_33  | 0.00804  | 0.00336 | 0.00454    | 0.00707 | 0.02301 | 0.58           | Tenericutes    | Mollicutes            | Mycoplasmatales   | Mycoplasmataceae      | <i>Mycoplasma</i>     |
| OTU_36  | 0.00575  | 0.00408 | 0.00559    | 0.00629 | 0.02170 | 0.54           | Tenericutes    | Mollicutes            | Mycoplasmatales   | Mycoplasmataceae      | <i>Mycoplasma</i>     |
| OTU_61  | 0.00150  | 0.00209 | 0.00255    | 0.00580 | 0.01193 | 0.30           | Tenericutes    | Mollicutes            | Mycoplasmatales   | Mycoplasmataceae      | <i>Mycoplasma</i>     |

|                                                                          |         |         |         |         |         |         |                |                       |                   |                       |                       |
|--------------------------------------------------------------------------|---------|---------|---------|---------|---------|---------|----------------|-----------------------|-------------------|-----------------------|-----------------------|
| OTU_48                                                                   | 0.00211 | 0.00300 | 0.00494 | 0.00134 | 0.01139 | 0.28    | Proteobacteria | Gammaproteobacteria   | Thiotrichales     | Fastidiosibacteraceae | <i>Fangia</i>         |
| OTU_13                                                                   | 0.00372 | 0.00400 | 0.00108 | 0.00220 | 0.01100 | 0.28    | Proteobacteria | Gammaproteobacteria   | Vibrionales       | Vibrionaceae          | <i>Vibrio</i>         |
| OTU_42                                                                   | 0.00386 | 0.00224 | 0.00216 | 0.00122 | 0.00948 | 0.24    | Proteobacteria | Gammaproteobacteria   | Thiotrichales     | Fastidiosibacteraceae | <i>Cysteiniphilum</i> |
| OTU_35                                                                   | 0.00135 | 0.00199 | 0.00101 | 0.00451 | 0.00886 | 0.22    | Bacteroidota   | Bacteroidia           | Marinilabiliales  | Marinilabiliaceae     | <i>Labilibacter</i>   |
| OTU_60                                                                   | 0.00065 | 0.00097 | 0.00075 | 0.00143 | 0.00380 | 0.09    | Proteobacteria | Epsilonproteobacteria | Campylobacterales | Campylobacteraceae    | <i>Arcobacter</i>     |
| <b>SUM</b>                                                               |         |         |         |         |         | 2.63086 |                |                       |                   |                       |                       |
| <sup>a</sup> Percent of the total relative abundance of entire community |         |         |         |         |         | 65.77   |                |                       |                   |                       |                       |

**Table S6** – List of operational taxonomic units (OTUs) affiliated to Gram-positive bacteria (being presented the respective Phylum, Class, Order, Family, Genus and Species) extracted from the *Cerastoderma edule* gut by four DNA extraction kits (E.Z.N.A., DNeasy, PowerFecal, and Zymo). nd – not determined.

| #OTU ID      | E.Z.N.A.  | DNeasy    | PowerFecal | Zymo      | Phylum         | Class          | Order              | Family                | Genus                   | Species                |
|--------------|-----------|-----------|------------|-----------|----------------|----------------|--------------------|-----------------------|-------------------------|------------------------|
| OTU_30       | x         |           |            | x         | Tenericutes    | Mollicutes     | Mycoplasmatales    | Mycoplasmataceae      | <i>Mycoplasma</i>       | <i>M. mobile</i>       |
| OTU_40       |           | x         | x          | x         | Actinobacteria | Acidimicrobiia | Acidimicrobiales   | Ilumatobacteraceae    | <i>Ilumatobacter</i>    | <i>I. fluminis</i>     |
| OTU_65       |           | x         | x          | x         | Actinobacteria | Acidimicrobiia | Acidimicrobiales   | Ilumatobacteraceae    | <i>Ilumatobacter</i>    | <i>I. nonamiensis</i>  |
| OTU_67       |           | x         | x          | x         | Tenericutes    | Mollicutes     | Entomoplasmatales  | Spiroplasmataceae     | <i>Spiroplasma</i>      | <i>S. platyhelix</i>   |
| OTU_82       |           |           | x          | x         | Actinobacteria | Acidimicrobiia | Acidimicrobiales   | Ilumatobacteraceae    | <i>Ilumatobacter</i>    | <i>I. fluminis</i>     |
| OTU_81       |           | x         |            | x         | Firmicutes     | Clostridia     | Clostridiales      | Lachnospiraceae       | <i>Niameybacter</i>     | <i>N. massiliensis</i> |
| OTU_113      |           | x         |            | x         | Actinobacteria | Actinobacteria | Geodermatophilales | Geodermatophilaceae   | <i>Modestobacter</i>    | <i>M. versicolor</i>   |
| OTU_221      |           |           | x          |           | Actinobacteria | Acidimicrobiia | Acidimicrobiales   | Ilumatobacteraceae    | <i>Ilumatobacter</i>    | <i>I. nonamiensis</i>  |
| OTU_229      |           |           | x          |           | Actinobacteria | Acidimicrobiia | Acidimicrobiales   | Ilumatobacteraceae    | <i>Ilumatobacter</i>    | <i>I. fluminis</i>     |
| OTU_290      |           |           | x          |           | Actinobacteria | Actinobacteria | Streptomycetales   | Streptomycetaceae     | <i>Streptomyces</i>     | <i>S. aomiensis</i>    |
| OTU_297      |           |           | x          |           | Actinobacteria | Acidimicrobiia | Acidimicrobiales   | Ilumatobacteraceae    | <i>Ilumatobacter</i>    | <i>I. nonamiensis</i>  |
| OTU_119      |           | x         |            | x         | Firmicutes     | Clostridia     | Clostridiales      | nd                    | <i>Natranaerovirga</i>  | <i>N. pectinivora</i>  |
| OTU_314      |           |           | x          |           | Actinobacteria | Acidimicrobiia | Acidimicrobiales   | Ilumatobacteraceae    | <i>Ilumatobacter</i>    | <i>I. nonamiensis</i>  |
| OTU_337      |           |           | x          |           | Actinobacteria | Acidimicrobiia | Acidimicrobiales   | Ilumatobacteraceae    | <i>Ilumatobacter</i>    | <i>I. nonamiensis</i>  |
| OTU_207      |           | x         |            |           | Firmicutes     | Bacilli        | Lactobacillales    | Leuconostocaceae      | <i>Leuconostoc</i>      | nd                     |
| OTU_322      |           |           | x          |           | Firmicutes     | Bacilli        | Lactobacillales    | Leuconostocaceae      | <i>Leuconostoc</i>      | nd                     |
| OTU_96       |           | x         |            |           | Firmicutes     | Bacilli        | Bacillales         | Bacillaceae           | <i>Bacillus</i>         | sp. R48_27f            |
| OTU_161      |           | x         |            |           | Firmicutes     | Clostridia     | Clostridiales      | Peptostreptococcaceae | <i>Paeniclostridium</i> | <i>P. ghonii</i>       |
| <b>Total</b> | <b>2</b>  | <b>8</b>  | <b>11</b>  | <b>8</b>  |                |                |                    |                       |                         |                        |
| <b>%</b>     | <b>1%</b> | <b>2%</b> | <b>3%</b>  | <b>2%</b> |                |                |                    |                       |                         |                        |

**Table S7** – Relative abundance of the bacterial genera associated with *Cerastoderma edule* gut, as recovered by four DNA extraction kits (E.Z.N.A., DNeasy, PowerFecal, and Zymo). nd - not determined.

| E.Z.N.A. | DNeasy  | PowerFecal | Zymo    | SUM     | Phylum         | Class                 | Order             | Family                 | Genus                          |
|----------|---------|------------|---------|---------|----------------|-----------------------|-------------------|------------------------|--------------------------------|
| 0.84583  | 0.70754 | 0.54295    | 0.70394 | 2.80026 | Tenericutes    | Mollicutes            | Mycoplasmatales   | Mycoplasmataceae       | <i>Mycoplasma</i>              |
| 0.00721  | 0.03737 | 0.00631    | 0.09241 | 0.14329 | Proteobacteria | Alphaproteobacteria   | Rickettsiales     | Anaplasmataceae        | <i>Anaplasma</i>               |
| 0.01838  | 0.03448 | 0.02739    | 0.04518 | 0.12543 | Proteobacteria | Epsilonproteobacteria | Campylobacterales | Campylobacteraceae     | <i>Arcobacter</i>              |
| 0.05923  | 0.01029 | 0.00389    | 0.00217 | 0.07558 | Proteobacteria | Gammaproteobacteria   | Thiotrichales     | Fastidiosibacteraceae  | <i>Cysteiniphilum</i>          |
| 0.01581  | 0.01015 | 0.04308    | 0.00385 | 0.07289 | Proteobacteria | Gammaproteobacteria   | Vibrionales       | Vibrionaceae           | <i>Vibrio</i>                  |
| 0.00000  | 0.04781 | 0.00000    | 0.00942 | 0.05723 | Bacteroidetes  | Bacteroidia           | Marinilabiales    | Marinilabiales         | <i>Saccharicrinis</i>          |
| 0.00000  | 0.01879 | 0.01618    | 0.01937 | 0.05433 | Proteobacteria | Gammaproteobacteria   | Oceanospirillales | Endozoicomonadaceae    | <i>Endozoicomonas</i>          |
| 0.00000  | 0.00422 | 0.03609    | 0.00750 | 0.04780 | Proteobacteria | Deltaproteobacteria   | Desulfobacterales | Desulfobulbaceae       | <i>Desulfobulbus</i>           |
| 0.00000  | 0.00506 | 0.03357    | 0.00761 | 0.04624 | Actinobacteria | Acidimicrobiia        | Acidimicrobiales  | Ilumatobacteraceae     | <i>Ilumatobacter</i>           |
| 0.00163  | 0.00579 | 0.02488    | 0.00608 | 0.03838 | Proteobacteria | Deltaproteobacteria   | Desulfobacterales | Desulfobulbaceae       | <i>Desulfopila</i>             |
| 0.00000  | 0.01717 | 0.00634    | 0.01230 | 0.03581 | Proteobacteria | Gammaproteobacteria   | Chromatiales      | Woeseiaceae            | <i>Woeseia</i>                 |
| 0.00000  | 0.00230 | 0.02367    | 0.00499 | 0.03096 | Bacteroidetes  | Flavobacteriia        | Flavobacteriales  | Flavobacteriaceae      | <i>Actibacter</i>              |
| 0.00000  | 0.00249 | 0.02190    | 0.00592 | 0.03031 | Bacteroidetes  | Flavobacteriia        | Flavobacteriales  | Flavobacteriaceae      | <i>Lutimonas</i>               |
| 0.00000  | 0.00000 | 0.02517    | 0.00000 | 0.02517 | Proteobacteria | Gammaproteobacteria   | Chromatiales      | Ectothiorhodospiraceae | <i>Thiohalomonas</i>           |
| 0.00222  | 0.00542 | 0.01661    | 0.00000 | 0.02424 | Bacteroidetes  | Flavobacteriia        | Flavobacteriales  | Flavobacteriaceae      | <i>Tenacibaculum</i>           |
| 0.00000  | 0.00195 | 0.00000    | 0.02028 | 0.02222 | Chlamydiae     | Chlamydiia            | Parachlamydiales  | Criblamydiaceae        | <i>Criblamydia</i>             |
| 0.00293  | 0.01141 | 0.00000    | 0.00634 | 0.02068 | Proteobacteria | Alphaproteobacteria   | Rickettsiales     | Rickettsiaceae         | <i>Rickettsia</i>              |
| 0.00000  | 0.00000 | 0.01422    | 0.00428 | 0.01850 | Proteobacteria | Gammaproteobacteria   | Chromatiales      | Wenzhouxiangellaceae   | <i>Wenzhouxiangella</i>        |
| 0.00000  | 0.01670 | 0.00000    | 0.00128 | 0.01798 | Spirochaetes   | Spirochaetia          | Spirochaetales    | Spirochaetaceae        | <i>Spirochaeta</i>             |
| 0.00000  | 0.00000 | 0.01321    | 0.00224 | 0.01545 | Proteobacteria | Alphaproteobacteria   | Rhodobacterales   | Rhodobacteraceae       | <i>Roseobacter</i>             |
| 0.00000  | 0.00103 | 0.00814    | 0.00542 | 0.01458 | Proteobacteria | Gammaproteobacteria   | Cellvibrionales   | Haliaceae              | <i>Luminiphilus</i>            |
| 0.00107  | 0.00000 | 0.01059    | 0.00266 | 0.01432 | Proteobacteria | Epsilonproteobacteria | Campylobacterales | Helicobacteraceae      | <i>Sulfurovum</i>              |
| 0.00117  | 0.00000 | 0.00873    | 0.00270 | 0.01260 | Proteobacteria | Gammaproteobacteria   | Cellvibrionales   | Haliaceae              | nd                             |
| 0.00211  | 0.00300 | 0.00494    | 0.00134 | 0.01139 | Proteobacteria | Gammaproteobacteria   | Thiotrichales     | Fastidiosibacteraceae  | <i>Fangia</i>                  |
| 0.00000  | 0.00000 | 0.00909    | 0.00000 | 0.00909 | Proteobacteria | Gammaproteobacteria   | Chromatiales      | Ectothiorhodospiraceae | nd                             |
| 0.00135  | 0.00199 | 0.00101    | 0.00451 | 0.00886 | Bacteroidetes  | Bacteroidia           | Marinilabiales    | Marinilabiales         | <i>Labilibacter</i>            |
| 0.00000  | 0.00269 | 0.00209    | 0.00387 | 0.00865 | Tenericutes    | Mollicutes            | Entomoplasmatales | Spiroplasmataceae      | <i>Spiroplasma</i>             |
| 0.00000  | 0.00624 | 0.00000    | 0.00204 | 0.00829 | Proteobacteria | Deltaproteobacteria   | Desulfobacterales | Desulfobulbaceae       | <i>Candidatus Electrothrix</i> |
| 0.00818  | 0.00000 | 0.00000    | 0.00000 | 0.00818 | Proteobacteria | Gammaproteobacteria   | Pseudomonadales   | Pseudomonadaceae       | <i>Pseudomonas</i>             |



|         |         |         |         |         |                |                       |                    |                        |                           |
|---------|---------|---------|---------|---------|----------------|-----------------------|--------------------|------------------------|---------------------------|
| 0.00000 | 0.00414 | 0.00000 | 0.00384 | 0.00798 | Proteobacteria | Epsilonproteobacteria | Campylobacterales  | Campylobacteraceae     | <i>Sulfurospirillum</i>   |
| 0.00000 | 0.00775 | 0.00000 | 0.00000 | 0.00775 | Bacteroidetes  | Bacteroidia           | Marinilabiliales   | Marinifilaceae         | <i>Ancylomarina</i>       |
| 0.00000 | 0.00770 | 0.00000 | 0.00000 | 0.00770 | Proteobacteria | Deltaproteobacteria   | Desulfovibrionales | Desulfovibrionaceae    | <i>Desulfovibrio</i>      |
| 0.00530 | 0.00000 | 0.00000 | 0.00228 | 0.00758 | Bacteroidetes  | Flavobacteriia        | Flavobacteriales   | Flavobacteriaceae      | <i>Polaribacter</i>       |
| 0.00000 | 0.00100 | 0.00526 | 0.00000 | 0.00626 | Fusobacteria   | Fusobacteriia         | Fusobacteriales    | Fusobacteriaceae       | <i>Ilyobacter</i>         |
| 0.00000 | 0.00075 | 0.00536 | 0.00000 | 0.00611 | Bacteroidetes  | Flavobacteriia        | Flavobacteriales   | Weeksellaceae          | <i>Spongiimonas</i>       |
| 0.00000 | 0.00000 | 0.00588 | 0.00000 | 0.00588 | Actinobacteria | Nitriliruptoria       | Egibacterales      | Egibacteraceae         | <i>Egibacter</i>          |
| 0.00000 | 0.00000 | 0.00569 | 0.00000 | 0.00569 | Proteobacteria | Gammaproteobacteria   | Chromatiales       | nd                     | nd                        |
| 0.00000 | 0.00000 | 0.00562 | 0.00000 | 0.00562 | Proteobacteria | Gammaproteobacteria   | Chromatiales       | Chromatiaceae          | nd                        |
| 0.00000 | 0.00097 | 0.00438 | 0.00000 | 0.00535 | Proteobacteria | Alphaproteobacteria   | Rhizobiales        | Hyphomicrobiaceae      | <i>Filomicrobium</i>      |
| 0.00000 | 0.00000 | 0.00392 | 0.00122 | 0.00514 | Proteobacteria | Gammaproteobacteria   | Cellvibrionales    | Haliaceae              | <i>Haliea</i>             |
| 0.00000 | 0.00000 | 0.00490 | 0.00000 | 0.00490 | Proteobacteria | Gammaproteobacteria   | Chromatiales       | Chromatiaceae          | <i>Halochromatium</i>     |
| 0.00000 | 0.00372 | 0.00000 | 0.00095 | 0.00467 | Fusobacteria   | Fusobacteriia         | Fusobacteriales    | Fusobacteriaceae       | <i>Psychrilyobacter</i>   |
| 0.00082 | 0.00000 | 0.00265 | 0.00100 | 0.00446 | Bacteroidetes  | Flavobacteriia        | Flavobacteriales   | Flavobacteriaceae      | nd                        |
| 0.00432 | 0.00000 | 0.00000 | 0.00000 | 0.00432 | Proteobacteria | Gammaproteobacteria   | Enterobacterales   | Yersiniaceae           | <i>Serratia</i>           |
| 0.00000 | 0.00000 | 0.00226 | 0.00196 | 0.00421 | Proteobacteria | Deltaproteobacteria   | Desulfobacterales  | Desulfobacteraceae     | nd                        |
| 0.00257 | 0.00000 | 0.00000 | 0.00158 | 0.00414 | Bacteroidetes  | nd                    | nd                 | nd                     | nd                        |
| 0.00000 | 0.00000 | 0.00409 | 0.00000 | 0.00409 | Proteobacteria | Alphaproteobacteria   | Rhodobacterales    | Rhodobacteraceae       | <i>Tateyamaria</i>        |
| 0.00000 | 0.00000 | 0.00409 | 0.00000 | 0.00409 | Proteobacteria | Gammaproteobacteria   | Chromatiales       | Thioalkalspiraceae     | <i>Thiohalophilus</i>     |
| 0.00000 | 0.00388 | 0.00000 | 0.00000 | 0.00388 | Proteobacteria | Alphaproteobacteria   | Rickettsiales      | Rickettsiaceae         | <i>Candidatus Megaira</i> |
| 0.00228 | 0.00000 | 0.00144 | 0.00000 | 0.00372 | Proteobacteria | Alphaproteobacteria   | Rhodobacterales    | Rhodobacteraceae       | nd                        |
| 0.00000 | 0.00223 | 0.00000 | 0.00138 | 0.00360 | Firmicutes     | Clostridia            | Clostridiales      | Lachnospiraceae        | <i>Niameybacter</i>       |
| 0.00349 | 0.00000 | 0.00000 | 0.00000 | 0.00349 | Bacteroidetes  | Flavobacteriia        | Flavobacteriales   | Flavobacteriaceae      | <i>Lutibacter</i>         |
| 0.00000 | 0.00257 | 0.00000 | 0.00086 | 0.00343 | Bacteroidetes  | Bacteroidia           | Bacteroidales      | Bacteroidaceae         | <i>Bacteroides</i>        |
| 0.00000 | 0.00000 | 0.00327 | 0.00000 | 0.00327 | Proteobacteria | Alphaproteobacteria   | Rhodobacterales    | Rhodobacteraceae       | <i>Pseudoruegeria</i>     |
| 0.00000 | 0.00182 | 0.00000 | 0.00135 | 0.00318 | Actinobacteria | Actinobacteria        | Geodermatophilales | Geodermatophilaceae    | <i>Modestobacter</i>      |
| 0.00000 | 0.00314 | 0.00000 | 0.00000 | 0.00314 | Bacteroidetes  | Cytophagia            | Cytophagales       | Cytophagaceae          | <i>Cytophaga</i>          |
| 0.00000 | 0.00149 | 0.00000 | 0.00156 | 0.00306 | Proteobacteria | Gammaproteobacteria   | Oceanospirillales  | Endozoicomonadaceae    | <i>Kistimonas</i>         |
| 0.00292 | 0.00000 | 0.00000 | 0.00000 | 0.00292 | Proteobacteria | Oligoflexia           | Silvanigrellales   | Silvanigrellaceae      | <i>Silvanigrella</i>      |
| 0.00175 | 0.00000 | 0.00000 | 0.00112 | 0.00287 | Proteobacteria | Alphaproteobacteria   | Sphingomonadales   | Sphingomonadaceae      | <i>Zymomonas</i>          |
| 0.00000 | 0.00000 | 0.00281 | 0.00000 | 0.00281 | Proteobacteria | Gammaproteobacteria   | nd                 | nd                     | <i>Thiolapillus</i>       |
| 0.00000 | 0.00000 | 0.00271 | 0.00000 | 0.00271 | Proteobacteria | Gammaproteobacteria   | Cellvibrionales    | Haliaceae              | <i>Marimicrobium</i>      |
| 0.00000 | 0.00000 | 0.00268 | 0.00000 | 0.00268 | Proteobacteria | Gammaproteobacteria   | Chromatiales       | Ectothiorhodospiraceae | <i>Immirania</i>          |

|         |         |         |         |         |                |                     |                       |                                          |                                |
|---------|---------|---------|---------|---------|----------------|---------------------|-----------------------|------------------------------------------|--------------------------------|
| 0.00000 | 0.00000 | 0.00262 | 0.00000 | 0.00262 | Proteobacteria | Gammaproteobacteria | Cellvibrionales       | Haliaceae                                | <i>Halioglobus</i>             |
| 0.00000 | 0.00000 | 0.00255 | 0.00000 | 0.00255 | Proteobacteria | Deltaproteobacteria | Desulfobacterales     | Desulfobacteraceae                       | <i>Desulfococcus</i>           |
| 0.00000 | 0.00000 | 0.00252 | 0.00000 | 0.00252 | Acidobacteria  | Thermoanaerobaculia | Thermoanaerobaculales | Thermoanaerobaculaceae                   | <i>Thermoanaerobaculum</i>     |
| 0.00000 | 0.00000 | 0.00245 | 0.00000 | 0.00245 | Proteobacteria | Alphaproteobacteria | Rhizobiales           | Rhodobiaceae                             | <i>Andersenella</i>            |
| 0.00000 | 0.00000 | 0.00245 | 0.00000 | 0.00245 | Proteobacteria | Alphaproteobacteria | Rhodospirillales      | Geminococcaceae                          | <i>Candidatus Combothrix</i>   |
| 0.00000 | 0.00000 | 0.00245 | 0.00000 | 0.00245 | Proteobacteria | Gammaproteobacteria | Chromatiales          | Chromatiaceae                            | <i>Thiohalocapsa</i>           |
| 0.00000 | 0.00000 | 0.00000 | 0.00236 | 0.00236 | Proteobacteria | Gammaproteobacteria | Cellvibrionales       | Microbulbiferaceae                       | <i>Microbulbifer</i>           |
| 0.00000 | 0.00000 | 0.00229 | 0.00000 | 0.00229 | Proteobacteria | Alphaproteobacteria | Rhodobacterales       | Rhodobacteraceae                         | <i>Marivita</i>                |
| 0.00000 | 0.00000 | 0.00222 | 0.00000 | 0.00222 | Proteobacteria | Deltaproteobacteria | Desulfobacterales     | Desulfobacteraceae                       | <i>Desulfosarcina</i>          |
| 0.00000 | 0.00000 | 0.00206 | 0.00000 | 0.00206 | Proteobacteria | Gammaproteobacteria | Arenicellales         | Arenicellaceae                           | <i>Arenicella</i>              |
| 0.00000 | 0.00000 | 0.00186 | 0.00000 | 0.00186 | Actinobacteria | Actinobacteria      | Streptomycetales      | Streptomycetaceae                        | <i>Streptomyces</i>            |
| 0.00000 | 0.00000 | 0.00180 | 0.00000 | 0.00180 | Proteobacteria | Alphaproteobacteria | nd                    | nd                                       | nd                             |
| 0.00000 | 0.00000 | 0.00177 | 0.00000 | 0.00177 | Proteobacteria | Alphaproteobacteria | Rhodobacterales       | Rhodobacteraceae                         | <i>Sulfitobacter</i>           |
| 0.00093 | 0.00072 | 0.00000 | 0.00000 | 0.00164 | Bacteroidetes  | Bacteroidia         | Marinilabiales        | Prolixibacteraceae                       | <i>Prolixibacter</i>           |
| 0.00000 | 0.00000 | 0.00157 | 0.00000 | 0.00157 | Bacteroidetes  | Flavobacteriia      | Flavobacteriales      | Flavobacteriaceae                        | <i>Marinirhabdus</i>           |
| 0.00000 | 0.00084 | 0.00072 | 0.00000 | 0.00156 | Firmicutes     | Bacilli             | Lactobacillales       | Leuconostocaceae                         | <i>Leuconostoc</i>             |
| 0.00154 | 0.00000 | 0.00000 | 0.00000 | 0.00154 | Bacteroidetes  | Cytophagia          | Cytophagales          | Flammeovirgaceae                         | <i>Sedimentimix</i>            |
| 0.00000 | 0.00106 | 0.00000 | 0.00047 | 0.00153 | Firmicutes     | Clostridia          | Eubacteriales         | Eubacteriales <i>incertae sedis</i>      | <i>Natranaerovirga</i>         |
| 0.00152 | 0.00000 | 0.00000 | 0.00000 | 0.00152 | Proteobacteria | Gammaproteobacteria | nd                    | nd                                       | nd                             |
| 0.00000 | 0.00000 | 0.00144 | 0.00000 | 0.00144 | Bacteroidetes  | Flavobacteriia      | Flavobacteriales      | Flavobacteriaceae                        | <i>Taeania</i>                 |
| 0.00137 | 0.00000 | 0.00000 | 0.00000 | 0.00137 | Proteobacteria | Gammaproteobacteria | Vibrionales           | Vibrionaceae                             | nd                             |
| 0.00000 | 0.00000 | 0.00134 | 0.00000 | 0.00134 | Proteobacteria | Deltaproteobacteria | Desulfobacterales     | Desulfobacteraceae                       | <i>Candidatus Magnetomorum</i> |
| 0.00000 | 0.00129 | 0.00000 | 0.00000 | 0.00129 | Firmicutes     | Clostridia          | Clostridiales         | Clostridiales Family XII. Incertae Sedis | <i>Acidaminobacter</i>         |
| 0.00113 | 0.00000 | 0.00000 | 0.00000 | 0.00113 | nd             | nd                  | nd                    | nd                                       | nd                             |
| 0.00095 | 0.00000 | 0.00000 | 0.00000 | 0.00095 | Fibrobacteres  | Chitinivibrionia    | Chitinivibrionales    | Chitinivibrionaceae                      | <i>Chitinivibrio</i>           |
| 0.00000 | 0.00000 | 0.00085 | 0.00000 | 0.00085 | Proteobacteria | Alphaproteobacteria | Rhodobacterales       | Rhodobacteraceae                         | <i>Oceanicella</i>             |
| 0.00078 | 0.00000 | 0.00000 | 0.00000 | 0.00078 | Bacteroidetes  | Flavobacteriia      | Flavobacteriales      | Flavobacteriaceae                        | <i>Formosa</i>                 |
| 0.00025 | 0.00048 | 0.00000 | 0.00000 | 0.00073 | Proteobacteria | Gammaproteobacteria | Alteromonadales       | Shewanellaceae                           | <i>Shewanella</i>              |
| 0.00071 | 0.00000 | 0.00000 | 0.00000 | 0.00071 | Firmicutes     | Bacilli             | Bacillales            | Bacillaceae                              | <i>Bacillus</i>                |
| 0.00000 | 0.00058 | 0.00000 | 0.00000 | 0.00058 | Firmicutes     | Clostridia          | Clostridiales         | Peptostreptococcaceae                    | <i>Paeniclostridium</i>        |
| 0.00000 | 0.00000 | 0.00000 | 0.00039 | 0.00039 | Proteobacteria | Gammaproteobacteria | Oceanospirillales     | Hahellaceae                              | <i>Zooshikella</i>             |
| 0.00025 | 0.00000 | 0.00000 | 0.00000 | 0.00025 | Proteobacteria | Gammaproteobacteria | Alteromonadales       | Colwelliaceae                            | <i>Thalassomonas</i>           |

## 1.2. Supplementary figures

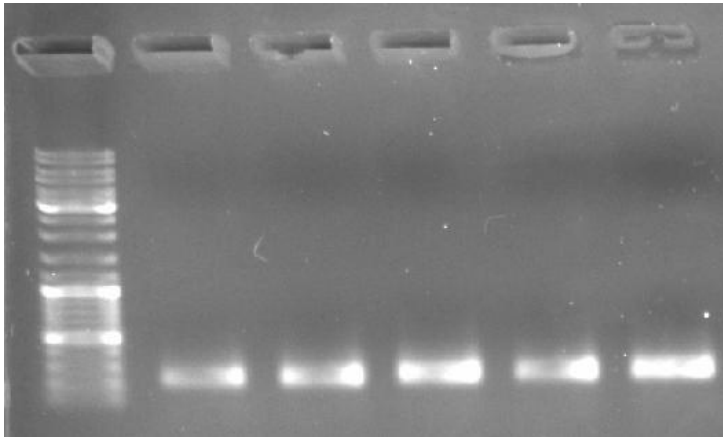

**Figure S1** – Example of PCR amplifications run in a 1% agarose gel electrophoresis. The marker (1 Kb DNA ladder, ThermoScientific) is in the first lane; the next 5 lanes correspond to the amplicons of the five replicates obtained for one DNA extraction kit.

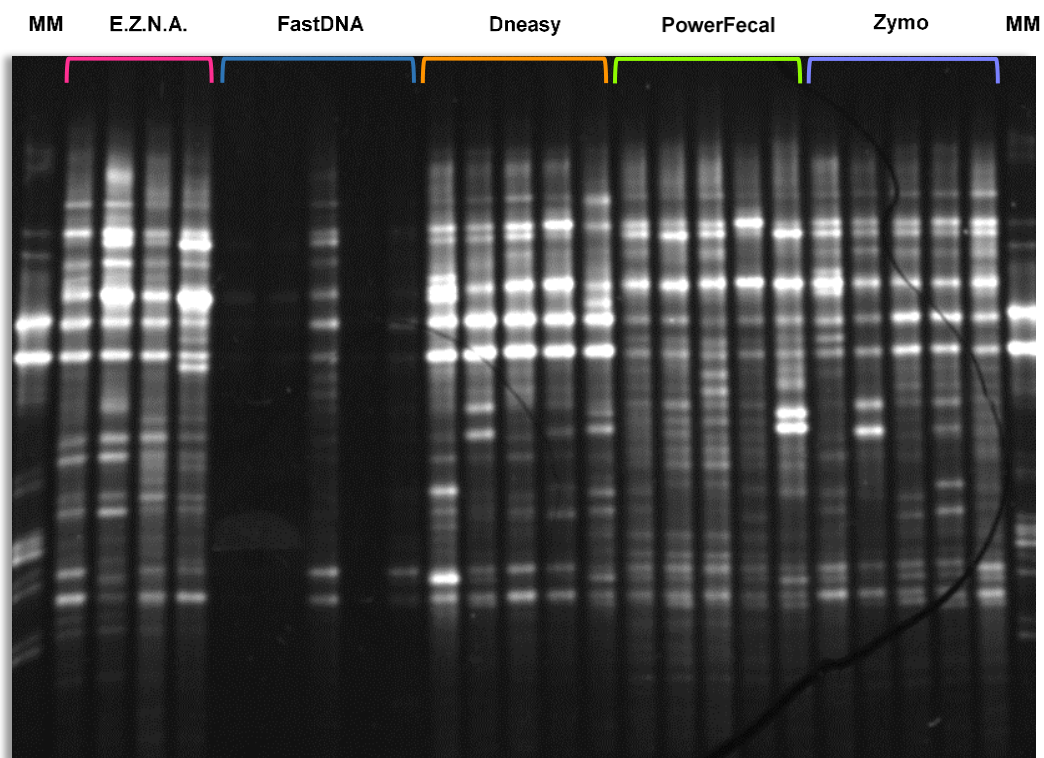

**Figure S2** – DGGE profiles of the bacterial community associated with the *Cerastoderma edule* gut, using five different DNA extraction kits (indicated above the gel picture; 5 replicates were tested *per* extraction kit). MM: molecular marker.

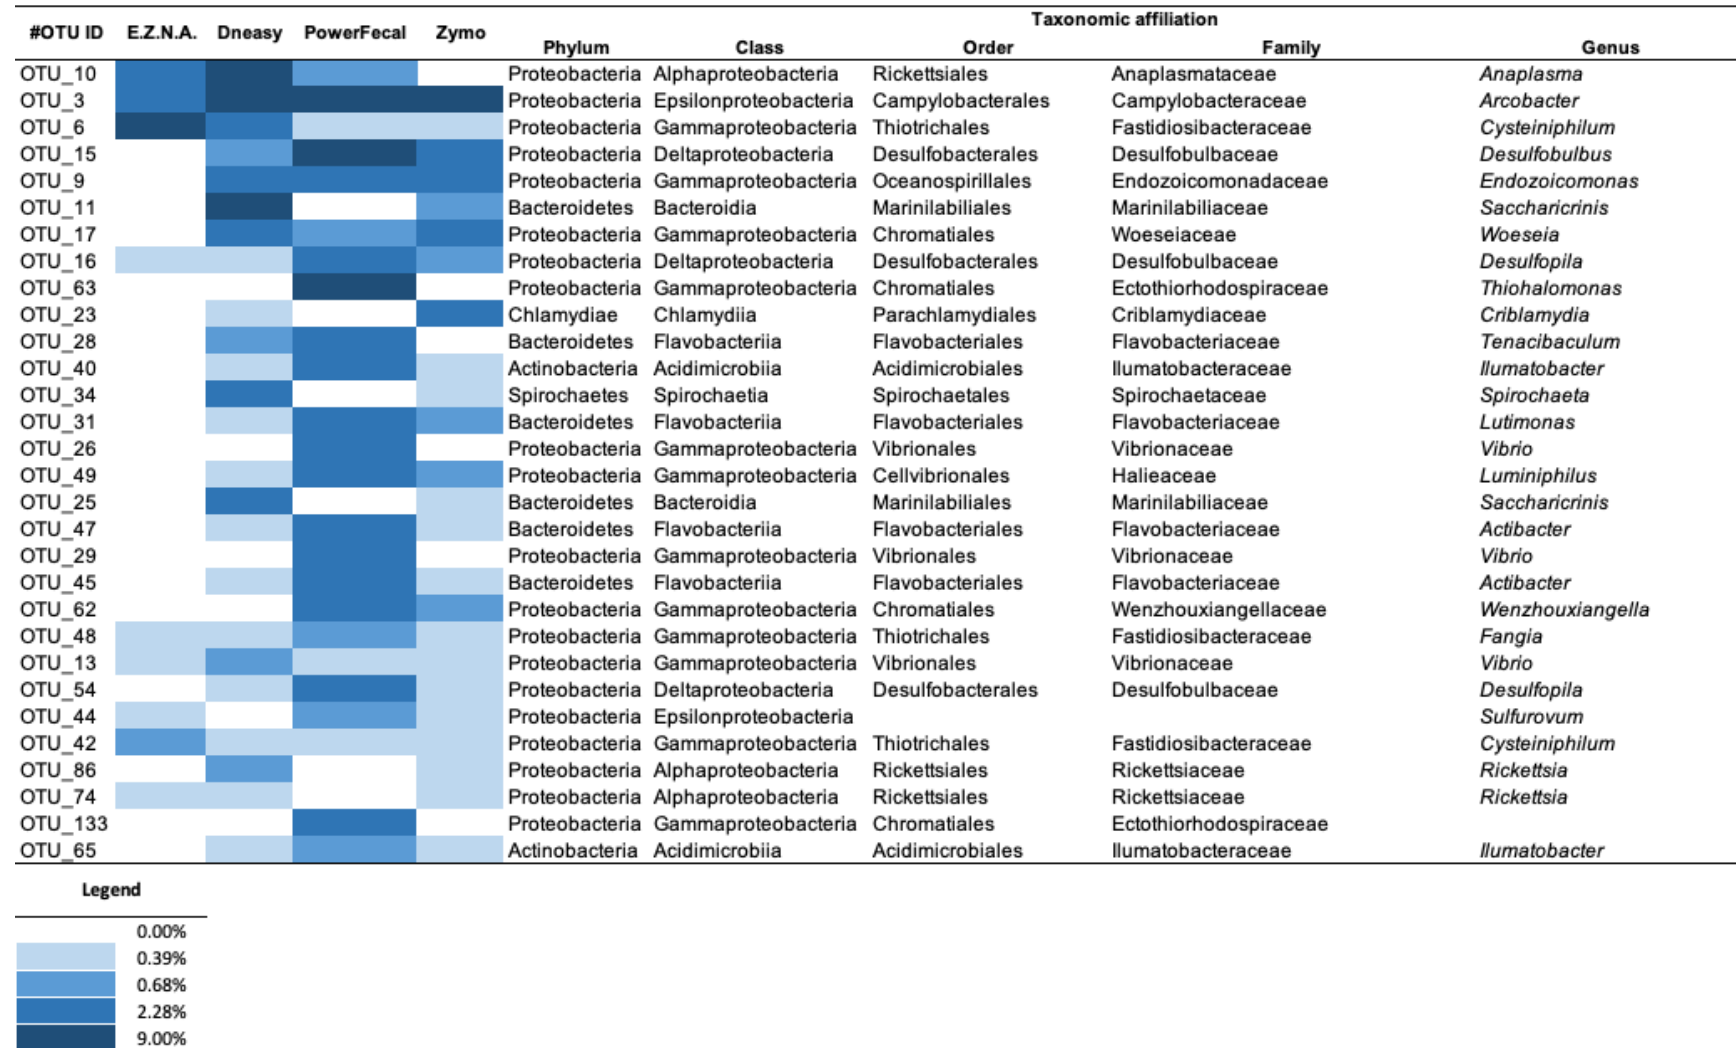

**Figure S3** – Heatmap showing the 30 predominant OTUs without *Mycoplasma* spp. in regard to the DNA extraction kit used (E.Z.N.A., DNeasy, PowerFecal, and Zymo). The colour code represents the relative abundance of OTUs (%). Values below 0.1% of relative abundance are represented in white.

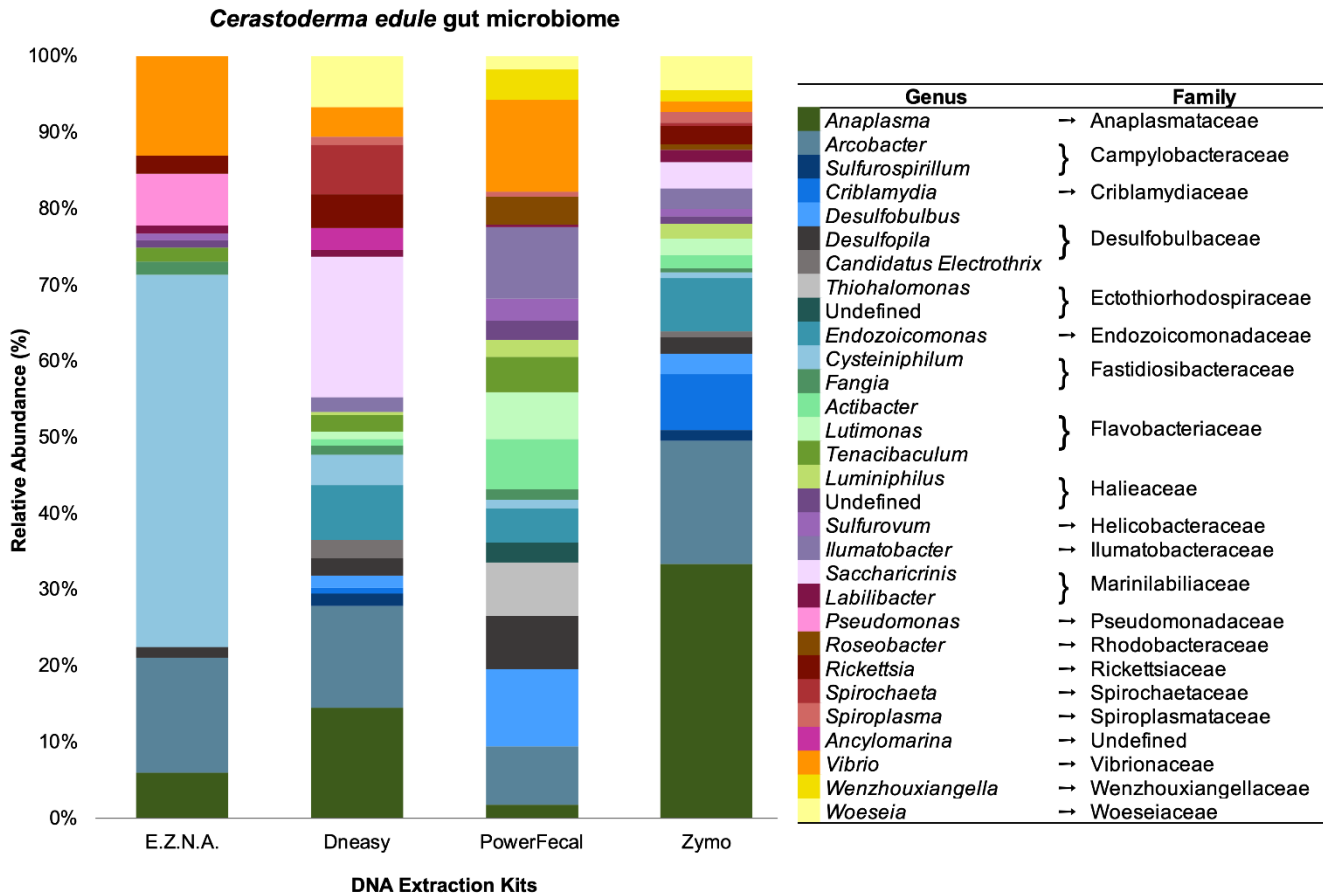

**Figure S4** – Relative abundance of the 30 predominant genera without *Mycoplasma* spp. in *Cerastoderma edule* gut, following the application of four DNA extraction kits (E.Z.N.A., DNeasy, PowerFecal, and Zymo).
